# Supplementary material
Source: ML conference proceedings conference paper supplement (https://proceedings.neurips.cc/paper_files/paper/2019/hash/7a2b33c672ce223b2aa5789171ddde2f-Abstract.html)
Supplement: Supplementary file [file 7a2b33c672ce223b2aa5789171ddde2f-Supplemental.zip]

# SUPPLEMENTARY MATERIAL TO Accelerating Rescaled Gradient Descent: Fast Minimization of Smooth Functions

Ashia C. Wilson   Lester Mackey   Andre Wibisono

## A Descent Flows

The derivation and analysis of descent algorithms is inspired by *descent flows*. In this section we introduce and analyze these family of dynamics.

**Definition 3** A dynamics is a **descent flow of order  $p$**  if it satisfies

$$\frac{d}{dt}f(X_t) \leq -\|\nabla f(X_t)\|_*^{\frac{p}{p-1}}, \quad (27)$$

for some  $1 < p \leq \infty$  and for all  $0 \leq t \leq \infty$ .

For dynamics that satisfy (27), we obtain non-asymptotic convergence guarantees for non-convex, convex and gradient-dominated functions. We summarize our main results for descent curves of order  $p$  in the following three theorems.

**Theorem 11** Suppose a dynamical system satisfies (27) for some  $1 < p \leq \infty$  and  $f$  is differentiable. Then the system satisfies

$$\min_{0 \leq s \leq t} \|\nabla f(X_s)\|_* = O\left(1/t^{\frac{p-1}{p}}\right). \quad (28)$$

**Theorem 12** Suppose a dynamical system satisfies (27) for some  $1 < p \leq \infty$  and  $f$  is differentiable and convex with  $R = \sup_{x: f(x) \leq f(x_0)} \|x - x^*\| < \infty$ . Then the system satisfies

$$f(X_t) - f(x^*) = \begin{cases} O\left(1/\left(1 + \frac{1}{Rp}t^{\frac{p-1}{p}}\right)^p\right) & \text{if } p < \infty \\ O(e^{-t/R}) & \text{if } p = \infty \end{cases}. \quad (29)$$

**Theorem 13** Suppose a dynamical system satisfies (27) for some  $1 < p \leq \infty$  and  $f$  is differentiable and  $\mu$ -gradient dominated of order  $p$ . Then the system satisfies

$$f(X_t) - f(x^*) = O\left(e^{-\frac{p}{p-1}\mu^{\frac{1}{p-1}}t}\right). \quad (30)$$

The proof of these results follows the same structure as the descent algorithms, with both relying on simple energy arguments.

### A.1 Proofs

To show (28), we begin with the energy function  $\mathcal{E}_t = f(X_t) - f(x^*)$ . A straightforward calculation shows

$$\frac{d}{dt}\mathcal{E}_t = \frac{d}{dt}f(X_t) \stackrel{(27)}{\leq} -\|\nabla f(X_t)\|_*^{\frac{p}{p-1}}.$$

Integrating and rearranging gives the bound

$$t \min_{0 \leq s \leq t} \|\nabla f(X_s)\|_*^{\frac{p}{p-1}} \leq \int_0^t -\|\nabla f(X_t)\|_*^{\frac{p}{p-1}} dt \leq \mathcal{E}_0 - \mathcal{E}_t.$$

from which we can conclude (28).

Next, fix any  $a > 0$ , and define the positive increasing function  $w_a(t) = (1 + t/(ap))^p$  which satisfies  $\frac{d}{dt} \log w_a(t) = \frac{1}{aw_a(t)^{1/p}}$  and the constant  $c_p = \frac{(1-1/p)^p}{p-1}$ . When  $p = \infty$ , each formal expression written in terms of  $p$  in this proof should be interpreted as the limit of that expression as  $p \rightarrow \infty$ . For example, if  $p = \infty$ ,  $w_a(t) = \lim_{q \rightarrow \infty} (1 + t/(aq))^q = e^{t/a}$  and  $c_p = \lim_{q \rightarrow \infty} \frac{(1-1/q)^q}{q-1} = 0$ .

To establish (29), we show the energy function

$$\mathcal{E}_t = w_a(t)(f(X_t) - f(x^*)) \quad (31)$$

grows at most linearly for any dynamical system that satisfies (27). To this end, observe that

$$\begin{aligned} \frac{d}{dt} \mathcal{E}_t &= w'_a(t)(f(X_t) - f(x^*)) + w_a(t) \frac{d}{dt} f(X_t) \\ &\leq w'_a(t) \langle \nabla f(X_t), x^* - X_t \rangle + w_a(t) \frac{d}{dt} f(X_t) \\ &\stackrel{(27)}{\leq} w'_a(t) \langle \nabla f(X_t), x^* - X_t \rangle - w_a(t) \|\nabla f(X_t)\|_*^{\frac{p}{p-1}} \\ &= w_a(t) \left( \frac{d}{dt} \log w_a(t) \langle \nabla f(X_t), x^* - X_t \rangle - \|\nabla f(X_t)\|_*^{\frac{p}{p-1}} \right) \\ &\leq w_a(t) c_p \left\| \frac{d}{dt} \log w_a(t) (X_t - x^*) \right\|^p \\ &= c_p \|X_t - x^*\|^p / a^p \leq c_p \frac{R^p}{a^p}. \end{aligned}$$

The first inequality uses the convexity of  $f$  and the second inequality uses (27). The third inequality uses the Fenchel-Young inequality

$$-\|s\|_*^{\frac{p}{p-1}} + \langle s, u \rangle \leq c_p \|u\|^p \quad (32)$$

for  $s = \nabla f(X_t)$  and  $u = \frac{d}{dt} \log w_a(t) (x^* - X_t)$ . The last step uses the fact that  $\|X_t - x^*\| \leq R = \sup_{x: f(x) \leq f(X_0)} \|x - x^*\|$  since condition (27) implies the dynamical system is a descent method. Moreover,  $R$  is finite, since the sublevel sets of  $f$  are bounded. Integrating allows us to obtain the statement  $\mathcal{E}_t - \mathcal{E}_0 \leq c_p \frac{R^p}{a^p} t$ , and subsequently, the upper bound

$$f(X_t) - f(x^*) \leq \frac{f(X_0) - f(x^*)}{(1+t/(ap))^p} + c_p \frac{R^p}{a^p} \frac{t}{(1+t/(ap))^p}.$$

Since  $a > 0$  was arbitrary, we may choose  $a = R \frac{(c_p t)^{1/p}}{(f(X_0) - f(x^*))^{1/p}}$  to obtain the bound

$$f(X_t) - f(x^*) \leq \frac{2(f(X_0) - f(x^*))}{\left(1 + \frac{(f(X_0) - f(x^*))^{1/p}}{R c_p^{1/p}} t^{\frac{p-1}{p}}\right)^p} = O(1/(1 + \frac{1}{R p} t^{\frac{p-1}{p}})^p)$$

as desired.

The last bound (30) uses the energy function  $\mathcal{E}_t = f(X_t) - f(x^*)$  to establish

$$\frac{d}{dt} \mathcal{E}_t = \frac{d}{dt} f(X_t) \stackrel{(27)}{\leq} -\|\nabla f(X_t)\|_*^{\frac{p}{p-1}} \leq \frac{p}{p-1} \mu^{\frac{1}{p-1}} \mathcal{E}_t.$$

where the last inequality follows from the gradient dominated condition. We use the intuition from the bounds established for descent dynamics to derive analogous results for descent algorithms.

## B Descent Algorithms

We present proofs of results Section 2.

### B.1 Proof of Theorems 1-3

We begin with detailed proofs of Theorems 1-3.

#### B.1.1 Proof of Theorem 1

By rearranging and summing (2), we obtain

$$\delta k \min_{j-k \leq s \leq j} \|\nabla f(x_s)\|_*^{\frac{p}{p-1}} \leq \sum_{s=j-k}^j \|\nabla f(x_s)\|_*^{\frac{p}{p-1}} \delta \leq f(x_0) - f(x_k) \leq f(x_0)$$

where  $j = k$  if the bound (2a) holds and  $j = k+1$  if the bound (2b) holds. Rearranging the inequality yields the result in Theorem 1.

### B.1.2 Proof of Theorem 2

Fix any  $a > 0$ , and define the positive increasing function  $w_a(t) = (1 + t/(ap))^p$ , which satisfies  $\frac{d}{dt} \log w_a(t) = \frac{1}{aw_a(t)^{1/p}}$ , and the constant  $c_p = \frac{(1-1/p)^p}{p-1}$ . When  $p = \infty$ , each formal expression written in terms of  $p$  in this proof should be interpreted as the limit of that expression as  $p \rightarrow \infty$ . For example, if  $p = \infty$ ,  $w_a(t) = \lim_{q \rightarrow \infty} (1 + t/(aq))^q = e^{t/a}$  and  $c_\infty = \lim_{q \rightarrow \infty} \frac{(1-1/q)^q}{q-1} = 0$ . For the proof of Theorem 2 under the condition (2a), we introduce the energy function

$$E_k = w_a(\delta k)(f(x_k) - f(x^*)),$$

noting that, by the convexity of  $w$  on  $t \geq 0$ ,

$$\frac{w_a(\delta(k+1)) - w_a(\delta k)}{\delta} \leq \frac{1}{a} \left(1 + \frac{\delta(k+1)}{ap}\right)^{p-1} = \frac{1}{a} w_a(\delta(k+1))^{(p-1)/p}.$$

and hence

$$\frac{w_a(\delta(k+1)) - w_a(\delta k)}{\delta w_a(\delta(k+1))} \leq \frac{1}{aw_a(\delta(k+1))^{1/p}}. \quad (33)$$

When (2a) holds, we have

$$\begin{aligned} \frac{E_{k+1} - E_k}{\delta} &= \frac{w_a(\delta(k+1)) - w_a(\delta k)}{\delta} (f(x_k) - f(x^*)) + w_a(\delta(k+1)) \frac{f(x_{k+1}) - f(x_k)}{\delta} \\ &\leq \frac{w_a(\delta(k+1)) - w_a(\delta k)}{\delta} \langle \nabla f(x_k), x_k - x^* \rangle + w_a(\delta(k+1)) \frac{f(x_{k+1}) - f(x_k)}{\delta} \\ &\stackrel{(2a)}{\leq} \frac{w_a(\delta(k+1)) - w_a(\delta k)}{\delta} \langle \nabla f(x_k), x_k - x^* \rangle - w_a(\delta(k+1)) \|\nabla f(x_k)\|_*^{\frac{p}{p-1}} \\ &= w_a(\delta(k+1)) \left( \frac{w_a(\delta(k+1)) - w_a(\delta k)}{\delta w_a(\delta(k+1))} \langle \nabla f(x_k), x_k - x^* \rangle - \|\nabla f(x_k)\|_*^{\frac{p}{p-1}} \right) \\ &\leq w_a(\delta(k+1)) \left( \frac{1}{aw_a(\delta(k+1))^{1/p}} \langle \nabla f(x_k), x_k - x^* \rangle - \|\nabla f(x_k)\|_*^{\frac{p}{p-1}} \right) \\ &\leq w_a(\delta(k+1)) c_p \left\| \frac{1}{aw_a(\delta(k+1))^{1/p}} (x_k - x^*) \right\|^p \\ &= c_p \|x_k - x^*\|^p / a^p \leq c_p R^p / a^p. \end{aligned}$$

The first inequality uses convexity of  $f$ , and the second uses (2a). The third inequality is an application of (33). The fourth inequality uses the Fenchel-Young inequality  $-\|s\|_*^{\frac{p}{p-1}} + \langle s, u \rangle \leq -\frac{p-1}{p} \|s\|_*^{\frac{p}{p-1}} + \langle s, u \rangle \leq \frac{1}{p} \|u\|^p$  with  $s = \nabla f(x_k)$  and  $u = \frac{1}{aw_a(\delta(k+1))^{1/p}} (x_k - x^*)$ . Both descent conditions (2) imply  $\|x_k - x^*\| \leq R$ , yielding the final inequality. Therefore, we have shown that for all  $k \geq 0$ ,  $E_{k+1} - E_k \leq c_p \delta R^p / a^p$ . This implies  $E_k \leq E_0 + c_p \delta k R^p / a^p$ . Therefore

$$f(x_k) - f(x^*) \leq \frac{f(x_0) - f(x^*)}{(1 + \delta k/(ap))^p} + c_p \frac{R^p}{a^p} \frac{\delta k}{(1 + \delta k/(ap))^p}.$$

Since  $a > 0$  was arbitrary, we may choose  $a = R \frac{(c_p \delta k)^{1/p}}{(f(x_0) - f(x^*))^{1/p}}$  to obtain the bound

$$f(x_k) - f(x^*) \leq \frac{2(f(x_0) - f(x^*))}{\left(1 + \frac{(f(x_0) - f(x^*))^{1/p}}{R c_p^{1/p}} (\delta k)^{\frac{p-1}{p}}\right)^p} = O(1/(1 + \frac{1}{R^p} (\delta k)^{\frac{p-1}{p}})^p)$$

as desired.

If, on the other hand (2b) holds, identical reasoning yields

$$\begin{aligned} \frac{E_{k+1} - E_k}{\delta} &= \frac{w_a(\delta(k+1)) - w_a(\delta k)}{\delta} (f(x_{k+1}) - f(x^*)) + w_a(\delta k) \frac{f(x_{k+1}) - f(x_k)}{\delta} \\ &\leq \frac{w_a(\delta(k+1)) - w_a(\delta k)}{\delta} \langle \nabla f(x_{k+1}), x_{k+1} - x^* \rangle + w_a(\delta k) \frac{f(x_{k+1}) - f(x_k)}{\delta} \\ &\stackrel{(2b)}{\leq} \frac{w_a(\delta(k+1)) - w_a(\delta k)}{\delta} \langle \nabla f(x_{k+1}), x_{k+1} - x^* \rangle - w_a(\delta k) \|\nabla f(x_{k+1})\|_*^{\frac{p}{p-1}} \\ &= w_a(\delta k) \left( \frac{w_a(\delta(k+1)) - w_a(\delta k)}{\delta w_a(\delta k)} \langle \nabla f(x_{k+1}), x_{k+1} - x^* \rangle - \|\nabla f(x_{k+1})\|_*^{\frac{p}{p-1}} \right) \\ &\leq w_a(\delta k) \left( \frac{w_a(\delta(k+1))}{aw_a(\delta k) w_a(\delta(k+1))^{1/p}} \langle \nabla f(x_{k+1}), x_{k+1} - x^* \rangle - \|\nabla f(x_{k+1})\|_*^{\frac{p}{p-1}} \right) \\ &\leq w_a(\delta k) c_p \left\| \frac{w_a(\delta(k+1))}{aw_a(\delta k) w_a(\delta(k+1))^{1/p}} (x_{k+1} - x^*) \right\|^p \\ &= \left( \frac{w_a(\delta(k+1))}{w_a(\delta k)} \right)^{p-1} c_p \frac{R^p}{a^p}. \end{aligned}$$

Now, since  $w_a(\delta(k+1)) \leq w_a(\delta k)w_a(\delta)$ , we have shown that for all  $k \geq 0$ ,  $E_{k+1} - E_k \leq w_a(\delta)^{p-1}c_p \frac{R^p}{a^p} \delta$ . This implies  $E_k \leq E_0 + w_a(\delta)^{p-1}c_p \frac{R^p}{a^p} \delta k$ . Hence, we find

$$f(x_k) - f(x^*) \leq \frac{f(x_0) - f(x^*)}{(1 + \delta k/(ap))^p} + w_a(\delta)^{p-1}c_p \frac{R^p}{a^p} \frac{\delta k}{(1 + \delta k/(ap))^p}.$$

Since  $a > 0$  was arbitrary, we may choose  $a = bw_b(\delta)^{(p-1)/p}$  for  $b = R \frac{(c_p \delta k)^{1/p}}{(f(x_0) - f(x^*))^{1/p}}$ . Since  $w_b(\delta) \geq 1$ , we have  $b \leq a$  and hence  $w_a(\delta) \leq w_b(\delta)$ . Therefore,

$$f(x_k) - f(x^*) \leq \frac{2(f(x_0) - f(x^*))}{\left(1 + \frac{(f(x_0) - f(x^*))^{1/p}}{R c_p^{1/p} p w_b(\delta)^{(p-1)/p}} (\delta k)^{\frac{p-1}{p}}\right)^p} = O(1/(1 + \frac{1}{R p} (\delta k)^{\frac{p-1}{p}})^p)$$

as desired.

### B.1.3 Proof of Theorem 3

Take the energy function  $E_k = f(x_k) - f(x^*)$ . Observe that if (2a) holds, then we have:

$$\frac{E_{k+1} - E_k}{\delta} = \frac{f(x_{k+1}) - f(x_k)}{\delta} \stackrel{(2a)}{\leq} -\|\nabla f(x_k)\|_*^{\frac{p}{p-1}} \stackrel{(3)}{\leq} -\frac{p}{p-1} \mu^{\frac{1}{p-1}} E_k,$$

or rewritten,  $E_{k+1} \leq \left(1 - \frac{p}{p-1} \mu^{\frac{1}{p-1}} \delta\right) E_k$ . Summing gives the bound

$$E_{k+1} \leq \left(1 - \frac{p}{p-1} \mu^{\frac{1}{p-1}} \delta\right)^k E_0 \leq e^{-\frac{p}{p-1} \mu^{\frac{1}{p-1}} \delta k} E_0,$$

using  $1 + x \leq e^x \forall x \in \mathbb{R}$ . On the other hand, if (2b) holds, then a similar argument follows:

$$\frac{E_{k+1} - E_k}{\delta} = \frac{f(x_{k+1}) - f(x_k)}{\delta} \stackrel{(2b)}{\leq} -\|\nabla f(x_{k+1})\|_*^{\frac{p}{p-1}} \stackrel{(3)}{\leq} -\frac{p}{p-1} \mu^{\frac{1}{p-1}} E_{k+1},$$

or rewritten,  $E_{k+1} \leq \left(1 + \frac{p}{p-1} \mu^{\frac{1}{p-1}} \delta\right)^{-1} E_k$ . Summing gives the bound

$$E_{k+1} \leq \left(1 + \frac{p}{p-1} \mu^{\frac{1}{p-1}} \delta\right)^{-k} E_0 \leq e^{-\frac{p}{p-1} \mu^{\frac{1}{p-1}} \delta k} E_0.$$

## B.2 Examples of descent methods

We now provide detailed demonstration that the examples provided are descent algorithms.

### B.2.1 Higher-order gradient descent

Let  $\tilde{p} = p - 1 + \nu$ . The optimality condition for the HGD algorithm (7) is

$$\sum_{i=1}^{p-1} \frac{1}{(i-1)!} \nabla^i f(x_k) (x_{k+1} - x_k)^{i-1} + \frac{1}{\eta} \|x_{k+1} - x_k\|^{\tilde{p}-2} B(x_{k+1} - x_k) = 0. \quad (34)$$

Since  $\nabla^{p-1} f$  is  $L$ -Lipschitz, we have the following error bound on the  $(p-2)$ -nd order Taylor expansion of  $\nabla f$ :

$$\left\| \nabla f(x_{k+1}) - \sum_{i=1}^{p-1} \frac{1}{(i-1)!} \nabla^i f(x_k) (x_{k+1} - x_k)^{i-1} \right\|_* \leq \frac{L}{(p-2)!} \|x_{k+1} - x_k\|^{p-2+\nu}. \quad (35)$$

Substituting (34) to (35) and writing  $r_k = \|x_{k+1} - x_k\|$ , we obtain

$$\left\| \nabla f(x_{k+1}) + \frac{r_k^{\tilde{p}-2}}{\eta} B(x_{k+1} - x_k) \right\|_* \leq \frac{L}{(p-2)!} r_k^{\tilde{p}-1}. \quad (36)$$

Squaring both sides, expanding, and rearranging the terms, we get the inequality

$$\langle \nabla f(x_{k+1}), x_k - x_{k+1} \rangle \geq \frac{\eta}{2r_k^{\tilde{p}-2}} \|\nabla f(x_{k+1})\|_*^2 + \frac{\eta r_k^{\tilde{p}}}{2} \left( \frac{1}{\eta^2} - \frac{L^2}{(p-2)!^2} \right). \quad (37)$$

If  $p = 2$ , then the first term in (37) already implies the desired bound below. Now assume  $p \geq 3$ . The right-hand side of (37) is of the form  $A/r^{\tilde{p}-2} + Br^{\tilde{p}}$ , which is a convex function of  $r > 0$  and

minimized by  $r^* = \left\{ \frac{(\tilde{p}-2)}{\tilde{p}} \frac{A}{B} \right\}^{\frac{1}{2\tilde{p}-2}}$ , yielding a minimum value of

$$\frac{A}{(r^*)^{\tilde{p}-2}} + B(r^*)^{\tilde{p}} = A^{\frac{p}{2\tilde{p}-2}} B^{\frac{\tilde{p}-2}{2\tilde{p}-2}} \left[ \left( \frac{\tilde{p}-2}{\tilde{p}} \right)^{\frac{\tilde{p}-2}{2\tilde{p}-2}} + \left( \frac{\tilde{p}-2}{\tilde{p}} \right)^{\frac{\tilde{p}}{2\tilde{p}-2}} \right] \geq A^{\frac{p}{2\tilde{p}-2}} B^{\frac{\tilde{p}-2}{2\tilde{p}-2}}.$$

Substituting the values  $A = \frac{\eta}{2} \|\nabla f(x_{k+1})\|_*^2$  and  $B = \frac{\eta}{2} \left( \frac{1}{\eta^2} - \frac{L^2}{(p-2)!^2} \right)$  from (37), we obtain

$$\langle \nabla f(x_{k+1}), x_k - x_{k+1} \rangle \geq \frac{\eta}{2} \left( \frac{1}{\eta^2} - \frac{L^2}{(p-2)!^2} \right)^{\frac{\bar{p}-2}{2\bar{p}-2}} \|\nabla f(x_{k+1})\|_*^{\frac{\bar{p}}{\bar{p}-1}}.$$

Finally, using the inequality  $f(x_k) - f(x_{k+1}) \geq \langle \nabla f(x_{k+1}), x_k - x_{k+1} \rangle$  by the convexity of  $f$  yields the progress bound

$$\begin{aligned} f(x_{k+1}) - f(x_k) &\leq -\frac{\eta^{\frac{1}{\bar{p}-1}}}{2} \left( 1 - \frac{(L\eta)^2}{(p-2)!^2} \right)^{\frac{\bar{p}-2}{2\bar{p}-2}} \|\nabla f(x_{k+1})\|_*^{\frac{\bar{p}}{\bar{p}-1}} \\ &\leq -\frac{\eta^{\frac{1}{\bar{p}-1}}}{2^{\frac{2\bar{p}-3}{\bar{p}-1}}} \|\nabla f(x_{k+1})\|_*^{\frac{\bar{p}}{\bar{p}-1}} \end{aligned}$$

where the least inequality uses the fact that  $\eta \leq \frac{\sqrt{3}(p-2)!}{2L}$ .

### B.2.2 Proximal method

The optimality condition for the proximal method is

$$\nabla^2 h(x_k)^{-1} \nabla f(x_{k+1}) + \frac{\|x_{k+1} - x_k\|_{x_k}^{p-2}}{\eta} (x_{k+1} - x_k) = 0,$$

which implies  $\|x_{k+1} - x_k\|_{x_k} = \eta^{\frac{1}{p-1}} \|\nabla f(x_{k+1})\|_{x_k}^{\frac{1}{p-1}}$ , using the shorthand  $\|v\|_{x_k,*} = \sqrt{\langle v, \nabla h(x_k)^{-1} v \rangle}$ . From the definition of  $x_{k+1}$ , we have  $f(x_{k+1}) + \frac{1}{p\eta} \|x_{k+1} - x_k\|_{x_k}^p \leq f(x_k)$ . Rearranging gives

$$f(x_k) - f(x_{k+1}) \geq \frac{1}{p\eta} \|x_{k+1} - x_k\|_{x_k}^p = \frac{\eta^{\frac{1}{p-1}}}{p} \|\nabla f(x_{k+1})\|_{*,x_k}^{\frac{p}{p-1}} \geq \frac{m^{\frac{p}{p-1}} \eta^{\frac{1}{p-1}}}{p} \|\nabla f(x_{k+1})\|_*^{\frac{p}{p-1}}$$

as desired.

### B.2.3 Natural gradient descent

Since  $\nabla^2 f \preceq LB$ , we have the bound

$$f(x_{k+1}) \leq f(x_k) + \langle \nabla f(x_k), x_{k+1} - x_k \rangle + \frac{L}{2} \|x_{k+1} - x_k\|^2.$$

Plugging in the NGD update (9) gives

$$f(x_{k+1}) \leq f(x_k) - \eta \langle \nabla f(x_k), (\nabla^2 h(x_k))^{-1} \nabla f(x_k) \rangle + \frac{L\eta^2}{2} \langle \nabla f(x_k), B(\nabla^2 h(x_k))^{-2} \nabla f(x_k) \rangle.$$

Since  $mB \preceq \nabla^2 h \preceq MB$ , we have  $\frac{1}{M} B^{-1} \preceq (\nabla^2 h)^{-1} \preceq \frac{1}{m} B^{-1}$ , so

$$\begin{aligned} f(x_{k+1}) &\leq f(x_k) - \frac{\eta}{M} \|\nabla f(x_k)\|_*^2 + \frac{L\eta^2}{2m^2} \|\nabla f(x_k)\|_*^2 \\ &= f(x_k) - \eta \left( \frac{1}{M} - \frac{L\eta}{2m^2} \right) \|\nabla f(x_k)\|_*^2 \\ &\leq f(x_k) - \frac{\eta}{2M} \|\nabla f(x_k)\|_*^2 \end{aligned}$$

where in the last step we have used the inequality  $\eta \leq \frac{m^2}{ML}$ .

### B.2.4 Mirror descent

Plugging the variational condition  $\nabla h(x_{k+1}) - \nabla h(x_k) = -\eta \nabla f(x_k)$  into the smoothness bound on  $f$ , as well as using the property  $mB \preceq \nabla^2 h$  we have

$$\begin{aligned} f(x_{k+1}) - f(x_k) &\leq \langle \nabla f(x_k), x_{k+1} - x_k \rangle + \frac{L}{2} \|x_{k+1} - x_k\|^2 \\ &\leq -\frac{1}{\eta} \langle \nabla h(x_{k+1}) - \nabla h(x_k), x_{k+1} - x_k \rangle + \frac{L}{2m^2} \|\nabla h(x_{k+1}) - \nabla h(x_k)\|_*^2 \end{aligned}$$

Given  $h$  is  $M$ -smooth,  $-\frac{1}{\eta} \langle \nabla h(x_{k+1}) - \nabla h(x_k), x_{k+1} - x_k \rangle \leq -\frac{1}{\eta M} \|\nabla h(x_{k+1}) - \nabla h(x_k)\|_*^2$  ((Nesterov, 2004, (2.1.8))) and therefore,

$$\begin{aligned} f(x_{k+1}) - f(x_k) &\leq -\left( \frac{1}{\eta M} - \frac{L}{2m^2} \right) \|\nabla h(x_{k+1}) - \nabla h(x_k)\|_*^2 \leq -\eta \left( \frac{1}{M} - \frac{L\eta}{2m^2} \right) \|\nabla f(x_k)\|_*^2 \\ &\leq -\frac{\eta}{2M} \|\nabla f(x_k)\|_*^2 \end{aligned}$$

where in the last step we have used the inequality  $\eta \leq \frac{m^2}{ML}$ .

### B.2.5 Proximal Bregman Method

The optimality condition for the proximal method is  $\eta \nabla f(x_{k+1}) = \nabla h(x_{k+1}) - \nabla h(x_k)$ , which implies  $\eta^2 \|\nabla f(x_{k+1})\|_*^2 = \|\nabla h(x_{k+1}) - \nabla h(x_k)\|_*^2 \leq M^2 \|x_{k+1} - x_k\|^2$ . From the definition of  $x_{k+1}$ , we have  $f(x_{k+1}) + \frac{1}{\eta} D_h(x_{k+1}, x_k) \leq f(x_k)$ . Rearranging gives

$$f(x_{k+1}) - f(x_k) \leq -\frac{1}{\eta} D_h(x_{k+1}, x_k) \leq -\frac{m}{2\eta} \|x_{k+1} - x_k\|^2 \leq -\frac{m\eta}{2M^2} \|\nabla f(x_{k+1})\|_*^2$$

as desired.

### B.3 Rescaled Gradient Descent

**Proof of Lemma 4** We show rescaled gradient descent satisfies progress bound (2) with  $\delta = \eta^{\frac{1}{p-1}}/2$  when  $f$  is strongly smooth. Since  $\|\nabla^p f(x)\| \leq L_p$ , we have the Taylor expansion bound,

$$\begin{aligned} f(x_{k+1}) - f(x_k) &\leq \langle \nabla f(x_k), x_{k+1} - x_k \rangle + \sum_{m=2}^{p-1} \frac{1}{m!} \nabla^m f(x_k) (x_{k+1} - x_k)^m + \frac{L_p}{p!} \|x_{k+1} - x_k\|^p \\ &\stackrel{(12)}{=} -\eta^{\frac{1}{p-1}} \left(1 - \frac{\eta L_p}{p!}\right) \|\nabla f(x_k)\|_*^{\frac{p}{p-1}} + \sum_{m=2}^{p-1} \frac{\eta^{\frac{m}{p-1}}}{m!} \frac{\nabla^m f(x_k) (\nabla f(x_k))^m}{\|\nabla f(x_k)\|_*^{\frac{m(p-2)}{p-1}}} \\ &\stackrel{(13)}{\leq} -\eta^{\frac{1}{p-1}} \left(1 - \frac{\eta L_p}{p!}\right) \|\nabla f(x_k)\|_*^{\frac{p}{p-1}} + \sum_{m=2}^{p-1} \frac{\eta^{\frac{m}{p-1}}}{m!} L_m \|\nabla f(x_k)\|_*^{m + \frac{p-m}{p-1} - \frac{m(p-2)}{p-1}} \\ &= -\eta^{\frac{1}{p-1}} \left(1 - \frac{\eta L_p}{p!}\right) \|\nabla f(x_k)\|_*^{\frac{p}{p-1}} + \sum_{m=2}^{p-1} \frac{\eta^{\frac{m}{p-1}}}{m!} L_m \|\nabla f(x_k)\|_*^{\frac{p}{p-1}} \\ &= -\eta^{\frac{1}{p-1}} \left(1 - \sum_{m=2}^p \frac{\eta^{\frac{m-1}{p-1}} L_m}{m!}\right) \|\nabla f(x_k)\|_*^{\frac{p}{p-1}}. \end{aligned}$$

The second line follows from the rescaled gradient update (12) and the third follows from our strongly smoothness Assumption (def 2). Since  $\eta < 1$  we can further bound

$$f(x_{k+1}) - f(x_k) \leq -\eta^{\frac{1}{p-1}} \left(1 - \eta^{\frac{1}{p-1}} \sum_{m=2}^p \frac{L_m}{m!}\right) \|\nabla f(x_k)\|_*^{\frac{p}{p-1}}.$$

Our step-size condition (14) implies  $1 - \eta^{\frac{1}{p-1}} \sum_{m=2}^p \frac{L_m}{m!} \geq \frac{1}{2}$ , which yields the desired bound (2) with  $\delta = \eta^{\frac{1}{p-1}}/2$ .

### B.4 Gradient Descent vs. Rescaled Gradient Descent

**Proof of Lemma 4** We have  $f'(x) = \text{sign}(x)|x|^{p-1}$ , so  $|f'(x)|^{\frac{p-2}{p-1}} = |x|^{p-2}$ .

The rescaled gradient descent of order  $p$  with step size  $\epsilon = \eta^{\frac{1}{p-1}}$  is

$$x_{k+1} = x_k - \epsilon \frac{f'(x_k)}{|f'(x_k)|^{\frac{p-2}{p-1}}} = x_k - \epsilon \frac{\text{sign}(x_k)|x_k|^{p-1}}{|x_k|^{p-2}} = (1 - \epsilon)x_k.$$

Therefore, if  $0 < \epsilon < 1$ , then  $x_k = (1 - \epsilon)^k x_0$ , and thus  $f(x_k) = (1 - \epsilon)^{pk} f(x_0)$  converges to 0 at an exponential rate  $\Theta((1 - \epsilon)^{pk})$ .

The gradient descent with step size  $\epsilon = \eta^{\frac{1}{p-1}}$  for  $f$  is

$$x_{k+1} = x_k - \epsilon f'(x_k) = x_k - \epsilon \text{sign}(x_k)|x_k|^{p-1} = (1 - \epsilon|x_k|^{p-2})x_k.$$

Note that if  $0 < \epsilon < |x_k|^{-(p-2)}$ , then  $x_{k+1}$  has the same sign as  $x_k$  with smaller magnitude. In particular, if  $0 < x_0 < \epsilon^{-\frac{1}{p-2}}$ , then  $x_k > x_{k+1} > 0$  for all  $k > 0$ , and gradient descent simplifies to  $x_{k+1} = (1 - \epsilon x_k^{p-2})x_k$ . Assume we start with  $0 < x_0 \leq (2\epsilon)^{-\frac{1}{p-2}}$ , so  $\frac{x_k}{x_{k+1}} = (1 - \epsilon x_k^{p-2})^{-1} \leq (1 - \epsilon x_0^{p-2})^{-1} \leq 2$ . Then by Jensen's inequality applied to the convex function  $x \mapsto x^{-(p-2)}$ , we have  $x_{k+1}^{-(p-2)} - x_k^{-(p-2)} \leq \frac{-(p-2)}{x_{k+1}^{p-1}}(x_k - x_{k+1}) = (p-2)\epsilon \frac{x_k^{p-1}}{x_{k+1}^{p-1}} \leq (p-2)2^{p-1}\epsilon$ . This implies  $x_k \geq (x_0^{-(p-2)} + (p-2)2^{p-1}\epsilon k)^{-\frac{1}{p-2}} = \Omega((\epsilon k)^{-\frac{1}{p-2}})$ , and thus  $f(x_k) \geq \Omega((\epsilon k)^{-\frac{p}{p-2}})$  converges to 0 at a polynomial rate.

#### B.4.1 Gradient Flow vs. Rescaled Gradient Flow

We also discuss how the behavior in discrete time above matches the behavior in continuous time. The rescaled gradient flow of order  $p$  for  $f$  is

$$\dot{X}_t = -\frac{f'(X_t)}{|f'(X_t)|^{\frac{p-2}{p-1}}} = -\frac{\text{sign}(X_t)|X_t|^{p-1}}{|X_t|^{p-2}} = -X_t$$

so  $X_t = e^{-t}X_0$ , and thus  $f(X_t) = e^{-pt}f(X_0)$  converges to 0 at an exponential rate  $\Theta(e^{-pt})$ .

The gradient flow (which is rescaled gradient flow of order 2) for  $f$  is

$$\dot{X}_t = -f'(X_t) = -\text{sign}(X_t)|X_t|^{p-1}$$

Without loss of generality assume  $X_0 > 0$ , so  $X_t > 0$  for all  $t > 0$ . Then gradient flow simplifies to  $\dot{X}_t = -X_t^{p-1}$ , or  $\frac{d}{dt}X_t^{-(p-2)} = -(p-2)\dot{X}_t X_t^{-(p-1)} = p-2$ , so  $X_t = (X_0^{-(p-2)} + (p-2)t)^{-\frac{1}{p-2}}$ , and thus  $f(X_t) = \Theta(t^{-\frac{p}{p-2}})$  converges to 0 at a polynomial rate.

More generally, the rescaled gradient flow of order  $q$  ( $q > 1, q \neq p$ ) for  $f$  is

$$\dot{X}_t = -\frac{f'(X_t)}{|f'(X_t)|^{\frac{q-2}{q-1}}} = -\frac{\text{sign}(X_t)|X_t|^{p-1}}{|X_t|^{\frac{(q-2)(p-1)}{q-1}}} = -\text{sign}(X_t)|X_t|^{\frac{p-1}{q-1}}$$

Assume  $X_0 > 0$ , so  $X_t > 0$  for all  $t > 0$ . Rescaled gradient flow simplifies to  $\dot{X}_t = -X_t^{\frac{p-1}{q-1}}$ , or  $\frac{d}{dt}X_t^{-\frac{p-q}{q-1}} = \frac{p-q}{q-1}$ , so  $X_t = (X_0^{-\frac{p-q}{q-1}} + (\frac{p-q}{q-1})t)^{-\frac{q-1}{p-q}}$ , and  $f(X_t) = \Theta(t^{-\frac{p(q-1)}{p-q}})$ . Note that if  $1 < q < p$ , then  $f(X_t)$  converges to 0 at a polynomial rate, which becomes faster as  $q \rightarrow p$ . At  $q = p$ , the convergence rate becomes exponential, as we see for rescaled gradient flow above. However, for  $q > p$ ,  $f(X_t)$  diverges to  $\infty$ . Thus, the best order to use is  $q = p$ , but it is better to underestimate  $p$ .

### C Accelerating Descent Algorithms

The energy function

$$E_k = D_h(x^*, z_k) + A_k(f(y_k) - f(x^*)), \quad (38)$$

will be used to analyze all the accelerated methods introduced in this paper.

#### C.1 Proof of Proposition 7

Take energy (Lyapunov) function (38) Set  $A_k = C\delta^p k^{(p)}$  where  $k^{(p)} = k(k+1) \cdots (k+p-1)$  is the rising factorial. Denote  $\alpha_k := \frac{A_{k+1} - A_k}{\delta} = C\delta^{p-1}(k+1)^{(p-1)}$  and  $\tau_k := \frac{\alpha_k}{A_{k+1}} = \frac{k}{\delta(k+p)}$ .

**Algorithm (15):** Using (38) we compute

$$\frac{E_{k+1} - E_k}{\delta} = \frac{D_h(x^*, z_{k+1}) - D_h(x^*, z_k)}{\delta} + \frac{A_{k+1}}{\delta}(f(y_{k+1}) - f(x^*)) - \frac{A_k}{\delta}(f(y_k) - f(x^*)). \quad (39)$$

We bound the first part,

$$\begin{aligned} \frac{D_h(x^*, z_{k+1}) - D_h(x^*, z_k)}{\delta} &= -\left\langle \frac{\nabla h(z_{k+1}) - \nabla h(z_k)}{\delta}, x^* - z_{k+1} \right\rangle - \frac{1}{\delta} D_h(z_{k+1}, z_k) \\ &\stackrel{(15b)}{=} \alpha_k \langle \nabla f(x_k), x^* - z_k \rangle + \alpha_k \langle \nabla f(x_k), z_k - z_{k+1} \rangle - \frac{1}{\delta} D_h(z_{k+1}, z_k) \\ &\leq \alpha_k \langle \nabla f(x_k), x^* - z_k \rangle + (\delta/m)^{\frac{1}{p-1}} \alpha_k^{\frac{p}{p-1}} \|\nabla f(x_k)\|_*^{\frac{p}{p-1}}, \end{aligned} \quad (40)$$

where the inequality follows from the  $m$ -uniform convexity of  $h$  of order  $p$  and the Fenchel-Young inequality  $\langle s, h \rangle + \frac{1}{p} \|h\|^p \geq -\frac{p}{p-1} \|s\|_*^{\frac{p}{p-1}} \leq -\|s\|_*^{\frac{p}{p-1}}$ , with  $h = (m/\delta)^{\frac{1}{p}}(z_{k+1} - z_k)$  and  $s = (\delta/m)^{\frac{1}{p}} \alpha_k^{\frac{p}{p-1}} \nabla f(x_k)$ . Plugging in update (15a),

$$\alpha_k \langle \nabla f(x_k), x^* - z_k \rangle = \alpha_k \langle \nabla f(x_k), x^* - y_k \rangle + \frac{A_{k+1}}{\delta} \langle \nabla f(x_k), y_k - x_k \rangle$$

$$\begin{aligned}
&= \alpha_k \langle \nabla f(x_k), x^* - x_k \rangle + \frac{A_k}{\delta} \langle \nabla f(x_k), y_k - x_k \rangle \\
&\leq - \left( \frac{A_{k+1}}{\delta} (f(y_{k+1}) - f(x^*)) - \frac{A_k}{\delta} (f(y_k) - f(x^*)) \right) \\
&\quad + A_{k+1} \frac{f(y_{k+1}) - f(x_k)}{\delta} \\
&\leq - \left( \frac{A_{k+1}}{\delta} (f(y_{k+1}) - f(x^*)) - \frac{A_k}{\delta} (f(y_k) - f(x^*)) \right) \\
&\quad - A_{k+1} \delta^{\frac{1}{p-1}} \|\nabla f(x_k)\|_*^{\frac{p}{p-1}}. \tag{41}
\end{aligned}$$

The first inequality follows from the convexity of  $f$  and rearranging terms. The second inequality uses the progress condition assumed for the sequence  $y_{k+1}$ . Combining (39) with (40) and (41) we have,

$$\frac{E_{k+1} - E_k}{\delta} \leq \left( (\delta/m)^{\frac{1}{p-1}} (Cp\delta^{p-1}(k+1)^{(p-1)})^{\frac{p}{p-1}} - C\delta^{\frac{1}{p-1}} \delta^p (k+1)^{(p)} \right) \|\nabla f(x_k)\|_*^{\frac{p}{p-1}}.$$

Given  $((k+1)^{(p-1)})^{\frac{p}{p-1}} / (k+1)^{(p)} \leq 1$ , it suffices that  $C \leq 1/mp^p$  to ensure  $\frac{E_{k+1} - E_k}{\delta} \leq 0$ . Summing the Lyapunov function gives the convergence rate  $f(y_k) - f(x^*) = O(1/A_k) = O(1/(\delta k)^p)$ .

**Algorithm (16):** Using (38) with the same parameter choices as algorithm (15), we have

$$\frac{D_h(x^*, z_{k+1}) - D_h(x^*, z_k)}{\delta} \leq \alpha_k \langle \nabla f(y_{k+1}), x^* - z_k \rangle + (\delta/m)^{\frac{1}{p-1}} \alpha_k^{\frac{p}{p-1}} \|\nabla f(y_{k+1})\|_*^{\frac{p}{p-1}}, \tag{42}$$

where the first part uses the same steps as (40) except update (16b) is used instead of (15b). Plugging in update (16a) yields the following,

$$\begin{aligned}
\alpha_k \langle \nabla f(y_{k+1}), x^* - z_k \rangle &= \alpha_k \langle \nabla f(y_{k+1}), x^* - y_{k+1} \rangle + \frac{A_{k+1}}{\delta} \langle \nabla f(y_{k+1}), y_{k+1} - z_k \rangle \\
&\stackrel{(16a)}{=} \alpha_k \langle \nabla f(y_{k+1}), x^* - y_{k+1} \rangle + \frac{A_k}{\delta} \langle \nabla f(y_{k+1}), y_k - y_{k+1} \rangle \\
&\quad + \frac{A_{k+1}}{\delta} \langle \nabla f(y_{k+1}), y_{k+1} - x_k \rangle \\
&\leq - \left( \frac{A_{k+1}}{\delta} (f(y_{k+1}) - f(x^*)) - \frac{A_k}{\delta} (f(y_k) - f(x^*)) \right) \\
&\quad + \frac{A_{k+1}}{\delta} \langle \nabla f(y_{k+1}), y_{k+1} - x_k \rangle \\
&\leq - \left( \frac{A_{k+1}}{\delta} (f(y_{k+1}) - f(x^*)) - \frac{A_k}{\delta} (f(y_k) - f(x^*)) \right) \\
&\quad - A_{k+1} \delta^{\frac{1}{p-1}} \|\nabla f(y_{k+1})\|_*^{\frac{p}{p-1}}. \tag{43}
\end{aligned}$$

The first inequality follows from the convexity of  $f$  and rearranging terms. The second inequality uses the progress condition assumed for the sequence  $y_{k+1}$ . Combining (39) with (42) (43), we have

$$\frac{E_{k+1} - E_k}{\delta} \leq -\delta^{\frac{1}{p-1}} C(k+1)^{(p)} \|\nabla f(y_{k+1})\|_*^{\frac{p}{p-1}} + (\delta/m)^{\frac{1}{p-1}} (Cp(k+1)^{(p-1)})^{\frac{p}{p-1}} \|\nabla f(y_{k+1})\|_*^{\frac{p}{p-1}}.$$

For  $\frac{E_{k+1} - E_k}{\delta} \leq 0$  it suffices that  $C \leq 1/mp^p$ . Summing the Lyapunov function gives the convergence rate  $f(y_k) - f(x^*) = O(1/A_k) = O(1/(\delta k)^p)$ .

## C.2 Restarting Scheme

When  $f$  is *strongly smooth* and  $\mu$ -gradient dominated, we define the restarting scheme (similar to (Wibisono et al., 2016, (B.1.2))), which proceeds by running 1 for some number of iterations at each step,

$$\hat{x}_k = (\text{the output } y_c \text{ of running Algorithm 1 for } c \text{ iterations with input } x_0 = \hat{x}_{k-c}). \tag{44}$$

**Theorem 14** Assume  $f$  is convex and strongly smooth of order  $1 < p < \infty$  with constants  $0 < L_1, \dots, L_p < \infty$  and  $f$  is  $\mu$ -gradient dominated of order  $p$ . Suppose  $\eta$  satisfies (14). Let  $\hat{x}_k$  be the output of running the restarting scheme (44) for  $k/c$  times with  $c = 2p/\kappa^{\frac{1}{p}}$  where  $\kappa = \mu\delta^p = \mu\eta$ . Finally, let  $y_k$  be the output of running the rescaled gradient descent update one step from  $\hat{x}_k$ . The composite scheme satisfies the convergence rate upper bound:  $f(y_k) - f(x^*) = O(\exp(-\frac{1}{2p}\mu^{\frac{1}{p}}\delta k))$



Take  $h(x) = \frac{2^{p-2}}{p} \|x - x_0\|^p$  which is 1-uniformly convex of order  $p$ . Running  $k$  iterations of either algorithm (15) or (16) results in the convergence bound,

$$\begin{aligned} \frac{\mu}{p} \|\hat{x}_k - x^*\|^p &\leq f(\hat{x}_k) - f(x^*) \leq \frac{2^{p-2} p^{p-1} \|\hat{x}_{k-c} - x^*\|^p}{\delta^p k^p} \leq \frac{2^{p-2} p^{p-1} \|\hat{x}_{k-c} - x^*\|^p}{(\delta c)^p} \\ &\leq \frac{\mu}{pe} \|\hat{x}_{k-c} - x^*\|^p. \end{aligned} \quad (45)$$

where the last inequality follows from the choice  $c = 2p/\kappa^{\frac{1}{p}}$ . Thus an execution of (44) for  $c$  iterations of the accelerated method reduces the distance to optimum by a factor of at least  $1/e$ . Iterating (45), we obtain  $\frac{1}{p} \|\hat{x}_k - x^*\|^p \leq e^{-k/c} \frac{1}{p} \|\hat{x}_0 - x^*\|^p$ . Using the descent property for both methods,  $E_{k+1} \leq \delta 2p^{p-1} \|x_k - x^*\|^p$  (2a) and  $E_{k+1} \leq \delta 2p^{p-1} \|x_{k+1} - x^*\|^p$  (2b), implies that

$$f(\hat{y}_k) - f(x^*) \leq \delta 2p^{p-1} e^{-\frac{\kappa}{2p} k} \|x_0 - x^*\|^p = O\left(e^{-\frac{\kappa}{2p} k}\right).$$

### C.3 Proof of Proposition 9

We analyze the following sequence of iterates

$$x_k = \delta \tau_k z_k + (1 - \delta \tau_k) y_k \quad (46a)$$

$$z_{k+1} = \arg \min_z \left\{ \alpha_k \langle \nabla f(y_{k+1}), z \rangle + \frac{1}{\delta} D_h(z, z_k) \right\}, \quad (46b)$$

where the update for  $(\lambda_{k+1}, y_{k+1})$  satisfies the descent conditions

$$a \leq \frac{\lambda_{k+1}}{\delta^{\frac{3p-2}{2}}} \|y_{k+1} - x_k\|^{p-2} \leq b, \quad (46c)$$

$$\|y_{k+1} - x_k + \frac{\lambda_{k+1}}{m} \nabla f(y_{k+1})\| \leq \frac{1}{2} \|y_{k+1} - x_k\|, \quad (46d)$$

and the following identifications  $\alpha_k = \frac{A_{k+1} - A_k}{\delta}$ ,  $\tau_k = \frac{\alpha_k}{A_{k+1}}$ , and  $\lambda_{k+1} = \frac{\alpha_k^2}{\delta^2 A_{k+1}}$  hold. Assume  $h$  is  $m$ -strongly convex.

Taking energy function (38), we compute

$$\begin{aligned} \frac{E_{k+1} - E_k}{\delta} &= \frac{A_{k+1}}{\delta} (f(y_{k+1}) - f(x^*)) - \frac{A_k}{\delta} (f(y_k) - f(x^*)) \\ &\quad - \left\langle \frac{\nabla h(z_{k+1}) - \nabla h(z_k)}{\delta}, x^* - z_{k+1} \right\rangle - D_h(z_{k+1}, z_k) \\ &\stackrel{(46b)}{\leq} \alpha_k (f(y_{k+1}) - f(x^*)) + \frac{A_k}{\delta} (f(y_{k+1}) - f(y_k)) + \alpha_k \langle \nabla f(y_{k+1}), x^* - z_{k+1} \rangle \\ &\quad - \frac{m}{2\delta} \|z_k - z_{k+1}\|^2 \\ &\leq \alpha_k \langle \nabla f(y_{k+1}), y_{k+1} - z_{k+1} \rangle + \frac{A_k}{\delta} \langle \nabla f(y_{k+1}), y_k - y_{k+1} \rangle - \frac{m}{2\delta} \|z_k - z_{k+1}\|^2. \end{aligned}$$

where the first inequality follows from the strong convexity of  $h$  and the last inequality follows from the convexity of  $f$ . Denote  $x = \delta \tau_k z_{k+1} + (1 - \delta \tau_k) y_k$ . Starting from the preceding line, we have,

$$\begin{aligned} \frac{E_{k+1} - E_k}{\delta} &\leq \frac{A_{k+1}}{\delta} \langle \nabla f(y_{k+1}), y_{k+1} - x \rangle - \frac{m}{2\delta} \|z_k - \frac{1}{\delta \tau_k} x + \frac{1 - \delta \tau_k}{\delta \tau_k} y_k\|^2 \\ &= \frac{A_{k+1}}{\delta} \langle \nabla f(y_{k+1}), y_{k+1} - x \rangle - \frac{1}{2(\delta \tau_k)^2} \frac{m}{\delta} \|\delta \tau_k z_k + (1 - \delta \tau_k) y_k - x\|^2 \\ &\stackrel{(46a)}{=} \frac{A_{k+1}}{\delta} \langle \nabla f(y_{k+1}), y_{k+1} - x \rangle - \frac{1}{2(\delta \tau_k)^2} \frac{m}{\delta} \|x_k - x\|^2 \\ &\leq \max_{x \in \mathcal{X}} \left\{ \frac{A_{k+1}}{\delta} \langle \nabla f(y_{k+1}), y_{k+1} - x \rangle - \frac{1}{2(\delta \tau_k)^2} \frac{m}{\delta} \|x_k - x\|^2 \right\}. \end{aligned}$$

Plugging in the solution, which satisfies  $x = x_k - \frac{\delta^2}{m} \frac{\alpha_k^2}{A_{k+1}} \nabla f(y_{k+1})$ , and noting  $\lambda_{k+1} = \frac{\delta^2 \alpha_k^2}{A_{k+1}}$  we obtain

$$\begin{aligned} \frac{E_{k+1} - E_k}{\delta} &\leq \frac{A_{k+1}}{\lambda_{k+1}} \frac{m}{2\delta} \left( \|y_{k+1} - x_k + \frac{\lambda_{k+1}}{m} \nabla f(y_{k+1})\|^2 - \|y_{k+1} - x_k\|^2 \right) \\ &\stackrel{(46d)}{\leq} -\frac{A_{k+1}}{\lambda_{k+1} \delta} \frac{m}{4} \|y_{k+1} - x_k\|^2. \end{aligned} \quad (47)$$

This is the same bound as (Monteiro and Svaiter, 2013, (3.12)) with  $\sigma = 0$ .

Rearranging the last inequality and summing over  $k$ , we have

$$\sum_{i=0}^k \frac{A_i}{\lambda_i} \frac{m}{4} \|y_{i+1} - x_i\|^2 \leq E_{k+1} + \sum_{i=0}^k \frac{A_i}{\lambda_i} \frac{m}{4} \|y_{i+1} - x_i\|^2 \leq E_0 = D_h(x^*, x_0), \quad (48)$$

where the last equality comes from taking  $A_0 = 0$ .

Notice that summing over our bound (47) gives us the rate

$$f(y_k) - f(x^*) \leq \frac{E_0}{A_k}.$$

Now we use the second bound (46c) to establish  $A_k = O(k^{\frac{3p-2}{2}})$ . This follows from arguments identical to the those given by (Gasnikov et al., 2019, p.6-7) and (Bubeck et al., p.6-8). Denote  $a_1 = a\delta^{\frac{3p-2}{2}}$ . Observe that

$$\sum_{i=0}^k \frac{A_i}{\lambda_i^{\frac{p}{p-2}}} a_1^{\frac{2}{p-2}} \stackrel{(46c)}{\leq} \sum_{i=0}^k \frac{A_i}{\lambda_i^{\frac{1}{1+\frac{2}{p-2}}}} (\lambda_i \|y_{i+1} - x_i\|^{p-2})^{\frac{2}{p-2}} \leq \sum_{i=0}^k \frac{A_i}{\lambda_i} \|y_{i+1} - x_i\|^2 \stackrel{(48)}{\leq} 4E_0/m. \quad (49)$$

Denote  $c_1 = a_1^{-\frac{2}{p-2}} 4E_0/m = (a\delta^{\frac{3p-2}{2}})^{-\frac{2}{p-2}} E_0 4/m$ . Using the previous line, we have

$$A_k \geq \frac{1}{4} \left( \sum_{i=1}^k \sqrt{\lambda_i} \right)^2 \geq \frac{1}{4} c_1^{-\frac{p-2}{p}} \left( \sum_{i=1}^k A_i^{\frac{p-2}{3p-2}} \right)^{\frac{3p-2}{p}}, \quad (50)$$

where the first inequality follows from definition of  $\alpha_k$  (see (Bubeck et al., Lem 2.6)) and the second inequality uses reverse Holders (see (Bubeck et al., p.7-8)). Specifically, we have

$$\alpha_k = \frac{\lambda_k + \sqrt{\lambda_k^2 + 4\lambda_k A_{k-1}}}{2} \geq \frac{\lambda_k}{2} + \sqrt{\lambda_k A_{k-1}} \geq \left( \frac{\lambda_k}{2} + \sqrt{A_{k-1}} \right)^2 - A_{k-1},$$

and  $\alpha_k^2 = \lambda_k A_k$  which allows us to conclude the first inequality. For the second inequality, we use reverse Holder (i.e.  $\|fg\|_1 \geq \|f\|_{\frac{1}{q}} \|g\|_{-\frac{1}{q-1}}$  for  $q \geq 1$ ) with  $q = 1 + \frac{p-2}{2p} = \frac{3p-2}{2p}$  so that  $-\frac{1}{q-1} = \frac{2p}{p-2}$ , we have

$$\sum_{i=0}^k \sqrt{\lambda_i} = \sum_{i=0}^k A_i^{\frac{p-2}{2p}} \left( \frac{A_i}{\lambda_i^{\frac{p}{p-2}}} \right)^{-\frac{p-2}{2p}} \geq \left( \sum_{i=0}^k A_i^{\frac{p-2}{3p-2}} \right)^{\frac{3p-2}{2p}} \left( \sum_{i=0}^k \frac{A_i}{\lambda_i^{\frac{p}{p-2}}} \right)^{-\frac{p-2}{2p}}. \quad (51)$$

Equation (50) follows from combining (51) with (49).

To end our proof, we use the elementary fact (Bubeck et al., Lem 3.4) that for a positive sequence  $B_j$  such that  $B_k^\alpha \geq c_2 \sum_{i=1}^k B_i$ , we have

$$B_k \geq \left( \frac{\alpha-1}{\alpha} c_2 k \right)^{\frac{1}{\alpha-1}}$$

with the identifications  $\alpha = \frac{p}{p-2}$ ,  $B_k = A_k^{\frac{p-2}{3p-2}}$  and  $c_2 = \frac{c_1}{4^{\frac{p}{3p-2}}}$ . Subsequently,

$$A_k \geq \left( \frac{2c_2 k}{p} \right)^{\frac{3p-2}{2}} = \Theta \left( (\delta k)^{\frac{3p-2}{2}} E_0^{-\frac{p-2}{2}} \right),$$

as desired. Picking up the constants, we have the bound

$$f(y_k) - f(x^*) \leq \frac{E_0}{A_k} = \frac{c_3 D_h(x^*, x_0)^{\frac{p}{2}}}{(\delta k)^{\frac{3p-2}{2}}},$$

where  $c_3^{-1} = a(2/p)^{\frac{3p-2}{2}} (4/m)^{-\frac{p-2}{2}}$ .

#### C.4 Restarting Scheme

When  $f$  is *strongly smooth* and  $\mu$ -gradient dominated, we define the restarting scheme (similar to (44)), which proceeds by running Algorithm 2 for some number of iterations at each step,

$$\hat{x}_k = (\text{the output } y_c \text{ of running Algorithm 2 for } c \text{ iterations with input } x_0 = \hat{x}_{k-c}). \quad (52)$$

We summarize the behavior of the restarting scheme in the following theorem:

**Theorem 15** Assume  $f$  is convex and  $s$ -strongly smooth of order  $1 < p < \infty$  with constants  $0 < L_1, \dots, L_p < \infty$  and  $f$  is  $\mu$ -gradient dominated of order  $p$ . Take  $h(x) = \frac{1}{2}\|x\|^2$ . Let  $\hat{x}_k$  be the output of running the restarting scheme (52) for  $k/c$  times with  $c = (p^3/2)^{\frac{p}{3p-2}} (e/3\kappa)^{\frac{2}{3p-2}}$  where  $\kappa = \mu\delta^{\frac{3p-2}{2}} = \mu\eta$ . Finally, let  $y_k$  be the output of running the rescaled gradient descent update one step from  $\hat{x}_k$ . Then we have the convergence rate upper bound:

$$f(y_k) - f(x^*) = O\left(\exp\left(-c_1\mu^{\frac{2}{3p-2}}\delta k\right)\right),$$

where  $c_1 = (3/e)^{\frac{2}{3p-2}}(2/p^3)^{\frac{p}{3p-2}}$ .

Take  $h(x) = \frac{1}{2}\|x\|^2$  which is 1-strongly convex. Running  $k$  iterations of algorithm (46) results in the convergence bound

$$\frac{\mu}{p}\|\hat{x}_k - x^*\|^p \leq f(\hat{x}_k) - f(x^*) \leq \frac{\frac{c_3}{2}\|\hat{x}_{k-c} - x^*\|^p}{(\delta k)^{\frac{3p-2}{2}}} \leq \frac{\frac{c_3}{2}\|\hat{x}_{k-c} - x^*\|^p}{(\delta c)^{\frac{3p-2}{2}}} \leq \frac{\mu}{pe}\|\hat{x}_{k-c} - x^*\|^p, \quad (53)$$

where the last inequality follows from the choice  $c = (c_3pe/2\kappa)^{\frac{2}{3p-2}}$  where  $\kappa = \delta^{\frac{3p-2}{2}}\mu$ . Thus an execution of (52) for  $c$  iterations of the accelerated method reduces the distance to optimum by a factor of at least  $1/e$ . Iterating (53), we obtain  $\frac{1}{p}\|\hat{x}_k - x^*\|^p \leq e^{-k/c} \frac{1}{p}\|\hat{x}_0 - x^*\|^p$ . Here, we require that the update from  $x_k$  to  $y_{k+1}$  be a descent algorithm. Using the descent property for both methods  $E_{k+1} \leq \delta 2p^{p-1}\|x_k - x^*\|^p$  (2a) and  $E_{k+1} \leq \delta 2p^{p-1}\|x_{k+1} - x^*\|^p$  (2b) implies that

$$f(\hat{y}_k) - f(x^*) \leq \delta 2p^{p-1}e^{-c_4\mu^{\frac{2}{3p-2}}\delta k}\|x_0 - x^*\|^p = O\left(e^{-c_4\mu^{\frac{2}{3p-2}}\delta k}\right),$$

where  $c_4 = (c_3pe/2)^{-\frac{2}{3p-2}}$ .

#### C.5 Proof of Theorem 10

We show under the strong smoothness, rescaled gradient descent with line search condition (46c) satisfies (46d). We summarize in the following Lemma.

**Lemma 16** Under the above assumptions, if  $\eta^{\frac{1}{p-1}} \leq \min\{\frac{2}{5p}, 1/(2\sum_{m=2}^p \frac{L_m}{m!})\}$  and  $\lambda_{k+1}$  is such that

$$\frac{3}{4} \leq \frac{\lambda_{k+1}\|x_{k+1} - x_k\|^{p-2}}{\eta} \leq \frac{5}{4}, \quad (54)$$

then rescaled gradient descent (12) satisfies

$$\|x_{k+1} - x_k + \lambda_{k+1}\nabla f(x_{k+1})\| \leq \frac{1}{2}\|x_{k+1} - x_k\|. \quad (55)$$

Note, we can write (54) as

$$\frac{3}{4} \frac{\eta^{\frac{1}{p-1}}}{\|\nabla f(x_k)\|^{\frac{p-2}{p-1}}} \leq \lambda_{k+1} \leq \frac{5}{4} \frac{\eta^{\frac{1}{p-1}}}{\|\nabla f(x_k)\|^{\frac{p-2}{p-1}}}. \quad (56)$$

Plugging in the RGD update (12) to (55), what we wish to show is that

$$\left\| \lambda_{k+1}\nabla f(x_{k+1}) - \frac{\eta^{\frac{1}{p-1}}}{\|\nabla f(x_k)\|^{\frac{p-2}{p-1}}} \nabla f(x_k) \right\| \leq \frac{\eta^{\frac{1}{p-1}}}{2} \|\nabla f(x_k)\|^{\frac{1}{p-1}}. \quad (57)$$

Since  $\|\nabla^p f(x)\| \leq L_p$ , we have the following Taylor expansion of  $\nabla f$ :

$$\nabla f(x_{k+1}) = \nabla f(x_k) + \sum_{m=2}^{p-1} \frac{1}{(m-1)!} (\nabla^m f(x_k))(x_{k+1} - x_k)^{m-1} + R_k$$

where  $R_k$  is the remainder term which can be bounded as

$$\|R_k\| \leq \frac{L_p}{(p-1)!} \|x_{k+1} - x_k\|^{p-1} = \frac{L_p}{(p-1)!} \eta \|\nabla f(x_k)\|.$$

Furthermore, by strong smoothness assumption, for  $m = 2, \dots, p-1$  we have

$$\begin{aligned} \|(\nabla^m f(x_k))(x_{k+1} - x_k)^{m-1}\| &= \eta^{\frac{m}{p-1}} \frac{|(\nabla^m f(x_k))(\nabla f(x_k))^{m-1}|}{\|\nabla f(x_k)\|^{\frac{(m-1)(p-2)}{p-1}}} \\ &\leq \eta^{\frac{m}{p-1}} \frac{L_m \|\nabla f(x_k)\|^{m-1 + \frac{p-m}{p-1}}}{\|\nabla f(x_k)\|^{\frac{(m-1)(p-2)}{p-1}}} \\ &= \eta^{\frac{m}{p-1}} L_m \|\nabla f(x_k)\|. \end{aligned}$$

By plugging in the bounds above to the left-hand side of (57), we get

$$\begin{aligned} &\left\| \lambda_{k+1} \nabla f(x_{k+1}) - \frac{\eta^{\frac{1}{p-1}}}{\|\nabla f(x_k)\|^{\frac{p-2}{p-1}}} \nabla f(x_k) \right\| \\ &= \left\| \left( \lambda_{k+1} - \frac{\eta^{\frac{1}{p-1}}}{\|\nabla f(x_k)\|^{\frac{p-2}{p-1}}} \right) \nabla f(x_k) + \lambda_{k+1} \sum_{m=2}^{p-1} \frac{1}{(m-1)!} (\nabla^m f(x_k))(x_{k+1} - x_k)^{m-1} + \lambda_{k+1} R_k \right\| \\ &\leq \left| \lambda_{k+1} - \frac{\eta^{\frac{1}{p-1}}}{\|\nabla f(x_k)\|^{\frac{p-2}{p-1}}} \right| \|\nabla f(x_k)\| + \lambda_{k+1} \sum_{m=2}^{p-1} \frac{1}{(m-1)!} \|(\nabla^m f(x_k))(x_{k+1} - x_k)^{m-1}\| + \lambda_{k+1} \|R_k\| \\ &\leq \left| \lambda_{k+1} - \frac{\eta^{\frac{1}{p-1}}}{\|\nabla f(x_k)\|^{\frac{p-2}{p-1}}} \right| \|\nabla f(x_k)\| + \lambda_{k+1} \sum_{m=2}^{p-1} \frac{1}{(m-1)!} \eta^{\frac{m}{p-1}} L_m \|\nabla f(x_k)\|_* + \lambda_{k+1} \frac{L_p}{(p-1)!} \eta \|\nabla f(x_k)\| \\ &= \left( \left| \lambda_{k+1} - \frac{\eta^{\frac{1}{p-1}}}{\|\nabla f(x_k)\|^{\frac{p-2}{p-1}}} \right| + \lambda_{k+1} \sum_{m=2}^{p-1} \frac{\eta^{\frac{m}{p-1}} L_m}{(m-1)!} + \lambda_{k+1} \frac{L_p}{(p-1)!} \eta \right) \|\nabla f(x_k)\| \\ &= \left( \left| \lambda_{k+1} - \frac{\eta^{\frac{1}{p-1}}}{\|\nabla f(x_k)\|^{\frac{p-2}{p-1}}} \right| + \lambda_{k+1} \sum_{m=2}^p \frac{\eta^{\frac{m}{p-1}} m L_m}{m!} \right) \|\nabla f(x_k)\| \\ &\leq \left( \left| \lambda_{k+1} - \frac{\eta^{\frac{1}{p-1}}}{\|\nabla f(x_k)\|^{\frac{p-2}{p-1}}} \right| + \lambda_{k+1} \eta^{\frac{2}{p-1}} p \sum_{m=2}^p \frac{L_m}{m!} \right) \|\nabla f(x_k)\| \\ &\leq \left( \left| \lambda_{k+1} - \frac{\eta^{\frac{1}{p-1}}}{\|\nabla f(x_k)\|^{\frac{p-2}{p-1}}} \right| + \lambda_{k+1} \frac{\eta^{\frac{1}{p-1}} p}{2} \right) \|\nabla f(x_k)\| \end{aligned}$$

where in the last step we have used that  $\eta^{\frac{1}{p-1}} \leq 1/(2 \sum_{m=2}^p \frac{L_m}{m!})$ .

Therefore, from the above, we see that if

$$\left| \lambda_{k+1} - \frac{\eta^{\frac{1}{p-1}}}{\|\nabla f(x_k)\|^{\frac{p-2}{p-1}}} \right| \leq \frac{\eta^{\frac{1}{p-1}}}{4 \|\nabla f(x_k)\|^{\frac{p-2}{p-1}}} \quad (58)$$

and

$$\lambda_{k+1} \frac{\eta^{\frac{1}{p-1}} p}{2} \leq \frac{\eta^{\frac{1}{p-1}}}{4 \|\nabla f(x_k)\|^{\frac{p-2}{p-1}}}, \quad (59)$$

then the desired relation (57) holds. The first condition (58) is equivalent to

$$\frac{3}{4} \frac{\eta^{\frac{1}{p-1}}}{\|\nabla f(x_k)\|^{\frac{p-2}{p-1}}} \leq \lambda_{k+1} \leq \frac{5}{4} \frac{\eta^{\frac{1}{p-1}}}{\|\nabla f(x_k)\|^{\frac{p-2}{p-1}}}$$

which is precisely the requirement (56), whereas the second condition (59) is equivalent to

$$\lambda_{k+1} \leq \frac{1}{2p \|\nabla f(x_k)\|^{\frac{p-2}{p-1}}}.$$

Note that if  $\eta^{\frac{1}{p-1}} \leq \frac{2}{5p}$ , then the last condition above is automatically satisfied if the right-hand side of the former condition (56) holds. Therefore, we have shown that the condition (56) implies the desired relation (57), or equivalently (55). A simple continuity argument, similar to (Bubeck et al., Lem 3.2) ensures the existence of pair  $(\lambda_k, y_k)$  that satisfies (54) and (55) simultaneously.

## C.6 Proximal method

Given  $x_k \in \mathbb{R}^n$  and  $\eta > 0$ , let  $x_{k+1}$  be the proximal update (8), which satisfies

$$x_{k+1} = x_k - \eta^{\frac{1}{p-1}} \frac{\nabla f(x_{k+1})}{\|\nabla f(x_{k+1})\|^{\frac{p-2}{p-1}}}. \quad (60)$$

**Lemma 17** *If  $\lambda_{k+1}$  is such that*

$$\frac{1}{2} \leq \frac{\lambda_{k+1} \|x_{k+1} - x_k\|^{p-2}}{\epsilon} \leq \frac{3}{2}, \quad (61)$$

*then*

$$\|x_{k+1} - x_k + \lambda_{k+1} \nabla f(x_{k+1})\| \leq \frac{1}{2} \|x_{k+1} - x_k\|. \quad (62)$$

Note (61) is equivalent to the condition

$$\frac{1}{2} \frac{\eta^{\frac{1}{p-1}}}{\|\nabla f(x_{k+1})\|^{\frac{p-2}{p-1}}} \leq \lambda_{k+1} \leq \frac{3}{2} \frac{\eta^{\frac{1}{p-1}}}{\|\nabla f(x_{k+1})\|^{\frac{p-2}{p-1}}}. \quad (63)$$

Plugging in the proximal update (60) to (62), what we wish to show is that

$$\left\| \lambda_{k+1} \nabla f(x_{k+1}) - \frac{\eta^{\frac{1}{p-1}}}{\|\nabla f(x_{k+1})\|^{\frac{p-2}{p-1}}} \nabla f(x_{k+1}) \right\| \leq \frac{\eta^{\frac{1}{p-1}}}{2} \|\nabla f(x_{k+1})\|^{\frac{1}{p-1}}.$$

Equivalently, we wish to show that

$$\left| \lambda_{k+1} - \frac{\eta^{\frac{1}{p-1}}}{\|\nabla f(x_{k+1})\|^{\frac{p-2}{p-1}}} \right| \leq \frac{\epsilon^{\frac{1}{p-1}}}{2 \|\nabla f(x_{k+1})\|^{\frac{p-2}{p-1}}},$$

which is exactly condition (63). Subsequently, we can write the Monteiro-Svaiter-style accelerated proximal method as the following sequence of updates,

---

### Algorithm 3 Monteiro-Svaiter-style accelerated proximal method

---

**Require:**  $f$  is differentiable and  $h$  is 1-strongly convex

- 1: Set  $x_0 = z_0 = 0$ ,  $A_0 = 0$ ,  $\delta^{\frac{3p-2}{2}} = \eta$ ,  $\eta > 0$
- 2: **for**  $k = 1, \dots, K$  **do**
- 3: Choose  $\lambda_{k+1}$  (e.g. by line search) such that  $\frac{1}{2} \leq \frac{\lambda_{k+1} \|y_{k+1} - x_k\|^{p-2}}{\eta} \leq \frac{3}{2}$ , where

$$y_{k+1} = \arg \min_{x \in \mathcal{X}} \left\{ f(x) + \frac{1}{\eta p} \|x - x_k\|^p \right\},$$

and  $\alpha_k = \frac{\lambda_{k+1} + \sqrt{\lambda_{k+1} + 4A_k \lambda_{k+1}}}{2\delta}$ ,  $A_{k+1} = \delta \alpha_k + A_k$ ,  $\tau_k = \frac{\alpha_k}{A_{k+1}}$  (so that  $\lambda_{k+1} = \frac{\delta^2 \alpha_k^2}{A_{k+1}}$ ) and

$$x_k = \delta \tau_k z_k + (1 - \delta \tau_k) y_k.$$

- 4: Update  $z_{k+1} = \arg \min_{z \in \mathcal{X}} \left\{ \alpha_k \langle \nabla f(y_{k+1}), z \rangle + \frac{1}{\delta} D_h(z, z_k) \right\}$
  - 5: **return**  $y_K$ .
- 

## D Examples and Numerical Experiments

### D.1 Comparison to Runge-Kutta

In Zhang et al. (2018) the following gradient lower bound assumption is made

**Definition 4**  $f$  satisfies the gradient lower bound of order  $p \geq 2$  if for all  $m = 1, \dots, p-1$ ,

$$f(x) - f(x^*) \geq \frac{1}{C_m} \|\nabla^m f(x)\|^{\frac{p}{p-m}} \quad \forall x \in \mathbb{R}^n$$

for some constants  $0 < C_1, \dots, C_{p-1} < \infty$ .

Notice that when  $p = 2$ , this is equivalent to  $s$ -strong smoothness, which is the general smoothness condition on the gradient. However, for  $p > 2$  we can show that it is slightly weaker than strong smoothness. We summarize in the following Lemma:

**Lemma 18** *If  $f$  is strongly smooth of order  $p$  with constants  $L_m$ , then  $f$  satisfies the gradient lower bound of order  $p$  with constants  $C_m = 4(\sum_{i=2}^p \frac{L_i}{i!})L_m^{\frac{p}{p-m}}$ .*

Let  $\eta = 1/(2\sum_{m=2}^p \frac{L_m}{m!})^{p-1}$  as in (2). Then with  $x_k = x$  and  $x_{k+1} = x - \eta^{\frac{1}{p-1}} \nabla f(x) / \|\nabla f(x)\|^{\frac{p-2}{p-1}}$ , by Lemma 4 we have

$$f(x^*) \leq f(x_{k+1}) \leq f(x) - \frac{\eta^{\frac{1}{p-1}}}{2} \|\nabla f(x)\|^{\frac{p}{p-1}} = f(x) - \frac{1}{4\sum_{m=2}^p \frac{L_m}{m!}} \|\nabla f(x)\|^{\frac{p}{p-1}}.$$

Rearranging gives the desired claim:

$$f(x) - f(x^*) \geq \frac{1}{4\sum_{m=2}^p \frac{L_m}{m!}} \|\nabla f(x)\|^{\frac{p}{p-1}}.$$

## D.2 Examples

We provide details on the examples presented in the main text.

### D.3 $\ell_p$ loss

Let

$$f(x) = \frac{1}{p} \|x\|_p^p = \frac{1}{p} \sum_{i=1}^d |x_i|^p = \frac{1}{p} \sum_{i=1}^d \text{sgn}(x_i)^p x_i^p.$$

The gradient  $\nabla f(x)$  has entries

$$(\nabla f(x))_i = \text{sgn}(x_i)^p x_i^{p-1}.$$

The norm of the gradient is

$$\|\nabla f(x)\| = \left( \sum_{i=1}^d x_i^{2p-2} \right)^{\frac{1}{2}} = \|x\|_{2p-2}^{p-1}.$$

Therefore, for  $m \geq 2$ ,

$$\|\nabla f(x)\|^{\frac{p-m}{p-1}} = \|x\|_{2p-2}^{p-m} = \left( \sum_{i=1}^d x_i^{2p-2} \right)^{\frac{p-m}{2p-2}}.$$

For  $m \geq 2$ , the  $m$ -th derivative  $\nabla^m f(x)$  has nonzero entries only on the diagonal:

$$(\nabla^m f(x))_{i,\dots,i} = (p-1) \cdots (p-m+1) \text{sgn}(x_i)^p x_i^{p-m}.$$

Then for any unit vector  $v \in \mathbb{R}^d$ ,

$$(\nabla^m f(x))(v^m) = (p-1) \cdots (p-m+1) \sum_{i=1}^d \text{sgn}(x_i)^p x_i^{p-m} v_i^m.$$

By Hölder's inequality with  $q = \frac{2p-2}{p-m}$  and  $r = \frac{2p-2}{p+m-2}$ , so  $\frac{1}{q} + \frac{1}{r} = 1$ , we have

$$\begin{aligned} |(\nabla^m f(x))(v^m)| &= (p-1) \cdots (p-m+1) \left| \sum_{i=1}^d \text{sgn}(x_i)^p x_i^{p-m} v_i^m \right| \\ &\leq (p-1) \cdots (p-m+1) \left( \sum_{i=1}^d |\text{sgn}(x_i)^p x_i^{p-m}|^{\frac{2p-2}{p-m}} \right)^{\frac{p-m}{2p-2}} \left( \sum_{i=1}^d |v_i^m|^{\frac{2p-2}{p+m-2}} \right)^{\frac{p+m-2}{2p-2}} \end{aligned}$$

$$= (p-1) \cdots (p-m+1) \|x\|_{2p-2}^{p-m} \left( \sum_{i=1}^d |v_i|^{\frac{2m(p-1)}{p+m-2}} \right)^{\frac{p+m-2}{2p-2}}.$$

Note that  $\frac{m(p-1)}{p+m-2} = 1 + \frac{(m-1)(p-2)}{p+m-2} \geq 1$ . Then using  $\sum_{i=1}^d c_i^q \leq (\sum_{i=1}^d c_i)^q$  for  $c_i \geq 0, q \geq 1$ , we can write

$$\sum_{i=1}^d |v_i|^{\frac{2m(p-1)}{p+m-2}} \leq \left( \sum_{i=1}^d v_i^2 \right)^{\frac{m(p-1)}{p+m-2}} = \|v\|_2^{\frac{2m(p-1)}{p+m-2}} = 1$$

since we assumed  $v$  is a unit norm vector, so  $\|v\|_2 = 1$ . Plugging this to the bound above, we obtain

$$\begin{aligned} |(\nabla^m f(x))(v^m)| &\leq (p-1) \cdots (p-m+1) \|x\|_{2p-2}^{p-m} \\ &= (p-1) \cdots (p-m+1) \|\nabla f(x)\|_{2p-2}^{\frac{p-m}{p-1}}. \end{aligned}$$

Taking the supremum over unit vectors  $v \in \mathbb{R}^d$ , we conclude that

$$\|\nabla^m f(x)\| \leq (p-1) \cdots (p-m+1) \|\nabla f(x)\|_{2p-2}^{\frac{p-m}{p-1}}.$$

This shows that  $f$  is strongly smooth of order  $p$  with constants

$$L_m = (p-1) \cdots (p-m+1).$$

#### D.4 Logistic loss

We show the logistic loss of strongly smooth of order  $p = \infty$ . We have

$$\nabla f(x) = -\frac{w}{1 + e^{-w^\top x}}$$

and

$$\|\nabla f(x)\| = \frac{\|w\|}{1 + e^{-w^\top x}}.$$

By induction we can see that

$$\nabla^m f(x) = -\frac{(m-1)! w^{\otimes m}}{(1 + e^{-w^\top x})^m}$$

so that

$$\|\nabla^m f(x)\| = \sup_{\|v\|=1} |(\nabla^m f(x))(v^m)| = \frac{(m-1)! \|w\|^m}{(1 + e^{-w^\top x})^m}.$$

Then

$$\frac{\|\nabla^m f(x)\|}{\|\nabla f(x)\|} = \frac{(m-1)! \|w\|^{m-1}}{(1 + e^{-w^\top x})^{m-1}} \leq (m-1)! \|w\|^{m-1}.$$

This shows that  $f(x) = \log(1 + e^{-w^\top x})$  satisfies the strong smoothness condition with  $p = \infty$  with constant

$$L_m = (m-1)! \|w\|^{m-1}.$$

#### D.5 GLM loss

Consider the generalized linear model loss function  $f(x) = \frac{1}{2}(y - \phi(x^\top w))^2$  for  $\phi(r) = 1/(1 + e^{-r}) \in (0, 1)$ ,  $y \in \{0, 1\}$ , and  $w \in \mathbb{R}^d$ . Introduce the shorthand  $b = 1 - 2y \in \{1, -1\}$ , and note that

$$\phi(r) - y = b\phi(br),$$

$$\phi'(r) = e^{-r}/(1 + e^{-r})^2 = \phi(r)\phi(-r) = \phi'(-r) \in (0, 1/4],$$

$$\phi'(r)/\phi(r) = \phi(-r),$$

$$\phi''(r) = \phi'(r)\phi(-r) - \phi(r)\phi'(-r) = \phi'(r)(\phi(-r) - \phi(r)) \in [-1/(6\sqrt{3}), 1/(6\sqrt{3})],$$

$$\phi''(r)/\phi'(r) = \phi(-r) - \phi(r), \quad \text{and}$$

$$\phi'''(r) = \phi''(r)(\phi(-r) - \phi(r)) - 2\phi'(r)^2 \in [-1/2, 0]$$

To simplify the presentation, we will fix  $x$  and let  $z = x^\top w$ . With this notation in place we have

$$\begin{aligned} f(x) &= \frac{1}{2}\phi(bz)^2, \\ \nabla f(x) &= b\phi(bz)\phi'(bz)w, \\ \nabla^2 f(x) &= (\phi'(bz)^2 + \phi(bz)\phi''(bz))ww^\top, \quad \text{and} \\ \nabla^3 f(x) &= b(3\phi'(bz)\phi''(bz) + \phi(bz)\phi'''(bz))w^{\otimes 3}. \end{aligned}$$

Since  $\phi(r)\phi'(r) \in (0, 1)$ , we have, for any  $a \in [0, 1]$

$$\begin{aligned} \frac{\|\nabla^2 f(x)\|}{\|\nabla f(x)\|^a} &= \frac{|\phi'(bz)^2 + \phi(bz)\phi''(bz)|}{|\phi(bz)\phi'(bz)|^a} \|w\|^{2-a} \leq \frac{|\phi'(bz)^2 + \phi(bz)\phi''(bz)|}{|\phi(bz)\phi'(bz)|} \|w\|^{2-a} \\ &= |2\phi(-bz) - \phi(bz)| \|w\|^{2-a} \leq 2\|w\|^{2-a}. \end{aligned}$$

Moreover,

$$\|\nabla^3 f(x)\| = |3\phi'(bz)\phi''(bz) + \phi(bz)\phi'''(bz)| \|w\|^3 \leq (\sqrt{3}/24 + 1/2) \|w\|^3.$$

Therefore,  $f$  is  $s$ -strongly smooth of order  $p = 3$  with  $L_2 = 2\|w\|^{1.5}$  and  $L_3 = (\sqrt{3}/24 + 1/2)\|w\|^3$ .

## E Additional Results

### E.1 Coordinate Descent Methods

At each iteration, a randomized coordinate method samples a coordinate direction  $i \in \{1, \dots, d\}$  uniformly at random and performs an update along that coordinate direction. Denote  $\nabla_{i_k} f = e_{i_k} e_{i_k}^\top \nabla f(x)$  where  $e_i$  is the  $i$ -th basis vector.

**Definition 5** An algorithm  $x_{k+1} = \mathcal{A}(x_k)$  is a **coordinate descent algorithm of order**  $1 < p \leq \infty$ , if for some constant  $0 < \delta < \infty$ , it almost surely satisfies

$$\frac{f(x_{k+1}) - f(x_k)}{\delta} \leq -\|\nabla_{i_k} f(x_k)\|_*^{\frac{p}{p-1}}. \quad (65)$$

For coordinate descent methods of order  $p$ , it is possible to obtain non-asymptotic guarantees for non-convex, convex and gradient dominated functions. We summarize in the following theorems.

**Theorem 19** Suppose an algorithm satisfies (65) for some  $0 < \delta < \infty$  and  $1 < p \leq \infty$  and  $f$  is differentiable. Then the algorithm also satisfies

$$\min_{0 \leq s \leq k} \mathbb{E} \|\nabla_{i_s} f(x_s)\|_* \leq (E_0/(\delta k))^{\frac{p-1}{p}} = O(1/\delta k). \quad (66)$$

**Theorem 20** Suppose an algorithm satisfies (65) for some  $0 < \delta < \infty$  and  $1 < p \leq \infty$  and  $f$  is differentiable and convex with  $R = \sup_{x: f(x) \leq f(x_0)} \|x - x^*\| < \infty$ . Then the algorithm satisfies

$$\mathbb{E}[f(x_k)] - f(x^*) = \begin{cases} O\left(1/\left(1 + \frac{1}{Rp}(\delta k)^{\frac{p-1}{p}}\right)^p\right) & \text{if } p < \infty \\ O(e^{-\delta k/R}) & \text{if } p = \infty \end{cases}. \quad (67)$$

**Theorem 21** Suppose an algorithm satisfies (2) for some  $0 < \delta < \infty$  and  $1 < p \leq \infty$ , and  $f$  is differentiable and  $\mu$ -gradient dominated of order  $p$ . Then the algorithm satisfies

$$\mathbb{E}[f(x_k)] - f(x^*) = O\left(e^{-\frac{1}{d} \frac{p}{p-1} \mu^{\frac{1}{p-1}} \delta k}\right). \quad (68)$$

#### E.1.1 Proof of Theorem 19

$$\delta k \mathbb{E} \min_{0 \leq s \leq k} \|\nabla_{i_s} f(x_s)\|_*^{\frac{p}{p-1}} \leq \mathbb{E} \sum_{s=0}^k \|\nabla_{i_s} f(x_s)\|_*^{\frac{p}{p-1}} \delta \leq f(x_0) - \mathbb{E} f(x_k) \leq f(x_0)$$

Rearranging the inequality yields the result in Theorem 19.



### E.1.2 Proof of Theorem 20

For the proof of Theorem 20 under the condition (65), we use the energy function

$$E_k = w_a(\delta k)(f(x_k) - f(x^*)),$$

When (65) holds, we have

$$\begin{aligned} \frac{E_{k+1} - E_k}{\delta} &= \frac{w_a(\delta(k+1)) - w_a(\delta k)}{\delta} (f(x_k) - f(x^*)) + w_a(\delta(k+1)) \frac{f(x_{k+1}) - f(x_k)}{\delta} \\ &\leq \frac{w_a(\delta(k+1)) - w_a(\delta k)}{\delta} \langle \nabla f(x_k), x_k - x^* \rangle + w_a(\delta(k+1)) \frac{f(x_{k+1}) - f(x_k)}{\delta} \\ &\stackrel{(65)}{\leq} \frac{w_a(\delta(k+1)) - w_a(\delta k)}{\delta} \langle \nabla f(x_k), x_k - x^* \rangle - w_a(\delta(k+1)) \|\nabla_{i_k} f(x_k)\|_*^{\frac{p}{p-1}} \\ &= w_a(\delta(k+1)) \left( \frac{w_a(\delta(k+1)) - w_a(\delta k)}{\delta w_a(\delta(k+1))} \langle \nabla f(x_k), x_k - x^* \rangle - \|\nabla_{i_k} f(x_k)\|_*^{\frac{p}{p-1}} \right) \\ &\leq w_a(\delta(k+1)) \left( \frac{1}{a w_a(\delta(k+1))^{1/p}} \langle \nabla f(x_k), x_k - x^* \rangle - \|\nabla_{i_k} f(x_k)\|_*^{\frac{p}{p-1}} \right) \\ &= w_a(\delta(k+1)) \left( \frac{1}{a w_a(\delta(k+1))^{1/p}} \langle \nabla_{i_k} f(x_k), x_k - x^* \rangle - \|\nabla_{i_k} f(x_k)\|_*^{\frac{p}{p-1}} \right) + \xi_k \\ &\leq w_a(\delta(k+1)) c_p \left\| \frac{1}{a w_a(\delta(k+1))^{1/p}} (x_k - x^*) \right\|^p + \xi_k \\ &= c_p \|x_k - x^*\|^p / a^p + \xi_k \leq c_p R^p / a^p + \xi_k. \end{aligned}$$

Here, the martingale  $\xi_k := \frac{w_a(\delta(k+1))}{a w_a(\delta(k+1))^{1/p}} \langle \nabla f(x_k) - \nabla_{i_k} f(x_k), x_k - x^* \rangle$ . The first inequality uses convexity of  $f$ , and the second uses (2a). The third inequality is an application of (33). The fourth inequality uses the Fenchel-Young inequality with  $s = \nabla_{i_k} f(x_k)$  and  $u = \frac{1}{a w_a(\delta(k+1))^{1/p}} (x_k - x^*)$ . Both descent conditions (2) imply  $\|x_k - x^*\| \leq R$ , yielding the final inequality. Therefore, we have shown that for all  $k \geq 0$ ,  $\mathbb{E}[E_{k+1}|x_k] - E_k \leq c_p \delta R^p / a^p$ . This implies  $\mathbb{E}[E_k] \leq E_0 + c_p \delta k R^p / a^p$ . Therefore

$$\mathbb{E}[f(x_k)] - f(x^*) \leq \frac{f(x_0) - f(x^*)}{(1 + \delta k / (ap))^p} + c_p \frac{R^p}{a^p} \frac{\delta k}{(1 + \delta k / (ap))^p}.$$

Since  $a > 0$  was arbitrary, we may choose  $a = R \frac{(c_p \delta k)^{1/p}}{(f(x_0) - f(x^*))^{1/p}}$  to obtain the bound

$$\mathbb{E}[f(x_k)] - f(x^*) \leq \frac{2(f(x_0) - f(x^*))}{\left(1 + \frac{(f(x_0) - f(x^*))^{1/p}}{R c_p^{1/p}} (\delta k)^{\frac{p-1}{p}}\right)^p} = O(1 / (1 + \frac{1}{R^p} (\delta k)^{\frac{p-1}{p}})^p)$$

as desired.

### E.1.3 Proof of Theorem 21

Take the energy function  $E_k = f(x_k) - f(x^*)$ , and observe that if (2a) holds, then we have:

$$\begin{aligned} \frac{\mathbb{E}[E_{k+1}|x_k] - E_k}{\delta} &= \frac{\mathbb{E}[f(x_{k+1})|x_k] - f(x_k)}{\delta} \stackrel{(65)}{\leq} -\mathbb{E}[\|\nabla_{i_k} f(x_k)\|_*^{\frac{p}{p-1}} | x_k] \\ &= -\frac{1}{d} \sum_{i=1}^d \|\nabla_i f(x_k)\|_*^{\frac{p}{p-1}} \\ &\leq -\frac{1}{d} \|\nabla f(x_k)\|_*^{\frac{p}{p-1}} \\ &\stackrel{(3)}{\leq} -\frac{1}{d} \frac{p}{p-1} \mu^{\frac{1}{p-1}} E_k, \end{aligned}$$

or rewritten,  $\mathbb{E}[E_{k+1}] \leq \left(1 - \frac{1}{d} \frac{p}{p-1} \mu^{\frac{1}{p-1}} \delta\right) E_k$ . Summing gives the bound

$$\mathbb{E}[E_{k+1}] \leq \left(1 - \frac{1}{d} \frac{p}{p-1} \mu^{\frac{1}{p-1}} \delta\right)^k E_0 \leq e^{-\frac{1}{d} \frac{p}{p-1} \mu^{\frac{1}{p-1}} \delta k} E_0,$$

### E.1.4 Rescaled coordinate descent

Rescaled coordinate descent,

$$x_{k+1} = x_k - \eta_{i_k}^{\frac{1}{p-1}} \frac{\nabla_{i_k} f(x_k)}{\|\nabla_{i_k} f(x_k)\|_*^{\frac{p-2}{p-1}}} = \arg \min_{x \in \mathcal{X}} \left\{ \langle \nabla_{i_k} f(x_k), x \rangle + \frac{1}{\eta_{i_k} p} \|x - x_k\|^p \right\} \quad (69)$$

where  $0 < \eta_{i_k} < \infty$  for  $i_k \in \{1, \dots, k\}$ , satisfies (65) provided the objective is strongly smooth along each coordinate direction.

**Definition 6** A function  $f$  is **strongly smooth** of order  $p$  along each coordinate direction for  $p > 1$ , if there exist constants  $0 < L_1^{(i)}, \dots, L_p^{(i)} < \infty$  for  $i = 1, \dots, d$ , such that for  $m = 1, \dots, p-1$  and for all  $x \in \mathbb{R}^d$ , as well as for all  $i \in \{1, \dots, d\}$

$$\nabla^m f(x) (\nabla_i f(x))^m \leq L_m^{(i)} \|\nabla_i f(x)\|_*^{m + \frac{p-m}{p-1}}, \quad (70)$$

and moreover for  $m = p$ ,  $f$  satisfies the condition  $\|\nabla^p f(x)\| \leq L_p^{(i)}$ .

We summarize our results regarding the rescaled coordinate descent in the following Lemma.

**Lemma 22** Suppose  $f$  is strongly smooth of order  $p \geq 2$  along each coordinate direction with constants  $0 < L_1^{(i)}, \dots, L_p^{(i)} < \infty$  for  $i = 1, \dots, d$ . Then rescaled gradient descent (69) with step size

$$0 < \eta_i^{\frac{1}{p-1}} \leq \min \left\{ 1, \frac{1}{\left( 2 \sum_{m=2}^p \frac{L_m^{(i)}}{m!} \right)} \right\} \quad (71)$$

satisfies (65) with  $\delta = \min_{i=1, \dots, d} \eta_i^{\frac{1}{p-1}} / 2$ .

## E.2 Accelerating Coordinate Descent Methods

Coordinate descent algorithms of order  $p$  can also be accelerated. Suppose  $f$  is convex. Set  $A_k = C\delta^p k^{(p)}$  where we use the rising factorial  $k^{(p)} = k(k+1) \cdots (k+p-1)$ . Denote  $\alpha_k := \frac{A_{k+1} - A_k}{\delta} = Cp\delta^{p-1}(k+1)^{(p-1)}$  and  $\tau_k := \frac{\alpha_k}{A_{k+1}} = \frac{k}{\delta(k+p)}$ . We write the algorithm as,

$$x_k = \delta\tau_k z_k + (1 - \delta\tau_k)y_k \quad (72a)$$

$$z_{k+1} = \arg \min_z \left\{ \alpha_k \langle \nabla_{i_k} f(x_k), z \rangle + \frac{1}{\delta} D_h(z, z_k) \right\} \quad (72b)$$

where the update for  $y_{k+1}$  satisfies the descent condition

$$\frac{f(y_{k+1}) - f(x_k)}{\delta^{\frac{p}{p-1}}} \leq -\|\nabla_{i_k} f(x_k)\|^{\frac{p}{p-1}}. \quad (73)$$

For algorithm (72), using (38) we compute

$$\frac{E_{k+1} - E_k}{\delta} = \frac{D_h(x^*, z_{k+1}) - D_h(x^*, z_k)}{\delta} + \frac{A_{k+1}}{\delta} (f(y_{k+1}) - f(x^*)) - \frac{A_k}{\delta} (f(y_k) - f(x^*)). \quad (74)$$

We bound the first part,

$$\begin{aligned} \frac{D_h(x^*, z_{k+1}) - D_h(x^*, z_k)}{\delta} &= - \left\langle \frac{\nabla h(z_{k+1}) - \nabla h(z_k)}{\delta}, x^* - z_{k+1} \right\rangle - \frac{1}{\delta} D_h(z_{k+1}, z_k) \\ &\stackrel{(72b)}{=} \alpha_k \langle \nabla_{i_k} f(x_k), x^* - z_k \rangle + \alpha_k \langle \nabla_{i_k} f(x_k), z_k - z_{k+1} \rangle \\ &\quad - \frac{1}{\delta} D_h(z_{k+1}, z_k) \\ &\leq \alpha_k \langle \nabla f(x_k), x^* - z_k \rangle - \xi_k - (\delta/m)^{\frac{1}{p-1}} \alpha_k^{\frac{p}{p-1}} \|\nabla_{i_k} f(x_k)\|^{\frac{p}{p-1}}, \end{aligned} \quad (75)$$

where  $\xi_k = \alpha_k \langle \nabla f(x_k) - \nabla_{i_k} f(x_k), x^* - z_k \rangle$  which is a martingale. The inequality follows from the  $m$ -uniform convexity of  $h$  of order  $p$  and the Fenchel-Young inequality  $\langle s, u \rangle + \frac{1}{p} \|u\|^p \geq -\frac{p}{p-1} \|s\|_*^{\frac{1}{p-1}}$ , with  $u = (m/\delta)^{\frac{1}{p}} (z_{k+1} - z_k)$  and  $s = (\delta/m)^{\frac{1}{p}} \alpha_k^{\frac{p}{p-1}} \nabla_{i_k} f(x_k)$ . Plugging in update (15a),

$$\begin{aligned} \alpha_k \langle \nabla f(x_k), x^* - z_k \rangle &= \alpha_k \langle \nabla f(x_k), x^* - y_k \rangle + \frac{A_{k+1}}{\delta} \langle \nabla f(x_k), y_k - x_k \rangle \\ &= \alpha_k \langle \nabla f(x_k), x^* - x_k \rangle + \frac{A_k}{\delta} \langle \nabla f(x_k), y_k - x_k \rangle \\ &\leq - \left( \frac{A_{k+1}}{\delta} (f(y_{k+1}) - f(x^*)) - \frac{A_k}{\delta} (f(y_k) - f(x^*)) \right) \\ &\quad + A_{k+1} \frac{f(y_{k+1}) - f(x_k)}{\delta} \\ &\stackrel{(73)}{\leq} - \left( \frac{A_{k+1}}{\delta} (f(y_{k+1}) - f(x^*)) - \frac{A_k}{\delta} (f(y_k) - f(x^*)) \right) \end{aligned}$$

$$-A_{k+1}\delta^{\frac{1}{p-1}}\|\nabla_{i_k}f(x_k)\|^{\frac{p}{p-1}}. \quad (76)$$

The first inequality follows from the convexity of  $f$  and rearranging terms. The second inequality uses (73). Combining (74) with (75) and (76) we have,

$$\frac{E_{k+1}-E_k}{\delta} \leq \left( (\delta/m)^{\frac{1}{p-1}} (Cp\delta^{p-1}(k+1)^{(p-1)})^{\frac{p}{p-1}} - C\delta^{\frac{1}{p-1}}\delta^p(k+1)^{(p)} \right) \|\nabla_{i_k}f(x_k)\|^{\frac{p}{p-1}} - \xi_k.$$

Given  $((k+1)^{(p-1)})^{\frac{p}{p-1}}/(k+1)^{(p)} \leq 1$ , it suffices that  $C \leq 1/mp^p$  to ensure  $\frac{\mathbb{E}[E_{k+1}|x_k]-E_k}{\delta} \leq 0$ . Summing, we obtain the desired bound.

$$\mathbb{E}[f(x_k)] - f(x^*) \lesssim 1/(\delta k)^p.$$

### E.2.1 Accelerating rescaled coordinate descent

A corollary to the coordinate descent property of rescaled descent with step size (71) is that it can be combined with sequences (72a) and (72b) to form a method with an  $O(1/(\delta k)^p)$  convergence rate upper bound. We summarize this result in the following theorem.

---

**Algorithm 4** Nesterov-style accelerated rescaled coordinate descent.

---

**Require:**  $f$  is strongly smooth of order  $p$  along each coordinate direction and  $h$  satisfies  $D_h(x, y) \geq \frac{1}{p}\|x - y\|^p$ .

- 1: Set  $x_0 = z_0 = 0$  and  $A_k = C\delta^p k^{(p)}$ ,  $\alpha_k = \frac{A_{k+1}-A_k}{\delta} = Cp\delta^{p-1}(k+1)^{(p-1)}$  and  $\tau_k = \frac{\alpha_k}{A_{k+1}} = \frac{k}{\delta(k+p)}$  where  $k^{(p)} := k(k+1)\cdots(k+p-1)$ .
  - 2: **for**  $k = 1, \dots, K$  **do**
  - 3:  $x_k = \delta\tau_k z_k + (1 - \delta\tau_k)y_k$
  - 4: sample  $i_k \in \{1, \dots, d\}$ . Update
  - 5:  $z_{k+1} = \arg \min_z \left\{ \alpha_k \langle \nabla_{i_k} f(x_k), z \rangle + \frac{1}{\delta} D_h(z, z_k) \right\}$
  - 6:  $y_{k+1} = x_k - \eta_{i_k}^{\frac{1}{p-1}} \frac{\nabla_{i_k} f(x_k)}{\|\nabla_{i_k} f(x_k)\|_*^{\frac{p-2}{p-1}}}$
  - 7: **return**  $y_K$ .
- 

**Theorem 23** Suppose  $f$  is convex and strongly smooth of order  $1 < p < \infty$  along each coordinate direction  $i$  with constants  $0 < L_1^{(i)}, \dots, L_p^{(i)} < \infty$ . Also suppose  $\eta_i$  satisfies (71). Then Algorithm 4 satisfies,

$$\mathbb{E}[f(y_k)] - f(x^*) \lesssim 1/(\delta k)^p.$$

### E.3 Optimal Universal Higher-order Tensor Methods

We say that it has Hölder continuous  $(p-1)$ -st order gradients of degree  $\nu \in [0, 1]$  on a convex set  $\mathcal{X} \subseteq \text{dom} f$ , if for some constant  $L_\nu$  it holds

$$\|\nabla^{p-1}f(x) - \nabla^{p-1}f(y)\| \leq L_\nu \|x - y\|^\nu \quad (77)$$

The final result of our paper contains the analysis of the following optimal algorithm for minimizing functions that satisfy (77)

---

**Algorithm 5** Monteiro-Svaiter-style universal higher-order tensor method.

---

**Require:**  $f$  satisfies (77) with parameters  $p$  and  $L_\nu$ ,  $h$  is 1-strongly convex,  $B = I$ ,  $\tilde{p} = p - 1 + \nu$ .

1: Set  $x_0 = z_0 = 0$ ,  $A_0 = 0$ ,  $\delta^{\frac{3p-2}{2}} = \eta$ ,  $\eta = L_\nu/(p-2)!$

2: **for**  $k = 1, \dots, K$  **do**

3: Choose  $\lambda_{k+1}$  (e.g. by line search) such that

$$\frac{1}{2} \leq \frac{\lambda_{k+1} \|y_{k+1} - x_k\|^{\tilde{p}-2}}{\eta} \leq \frac{3}{4}, \quad (78a)$$

where

$$y_{k+1} = \arg \min_{x \in \mathcal{X}} \left\{ f_{p-1}(x; x_k) + \frac{1}{\tilde{p}\eta} \|x - x_k\|^{\tilde{p}} \right\}, \quad (78b)$$

and  $\alpha_k = \frac{\lambda_{k+1} + \sqrt{\lambda_{k+1} + 4A_k\lambda_{k+1}}}{2\delta}$ ,  $A_{k+1} = \delta\alpha_k + A_k$ ,  $\tau_k = \frac{\alpha_k}{A_{k+1}}$  (so that  $\lambda_{k+1} = \frac{\delta^2\alpha_k^2}{A_{k+1}}$ ) and

$$x_k = \delta\tau_k z_k + (1 - \delta\tau_k)y_k.$$

4: Update  $z_{k+1} = \arg \min_{z \in \mathcal{X}} \left\{ \alpha_k \langle \nabla f(y_{k+1}), z \rangle + \frac{1}{\delta} D_h(z, z_k) \right\}$

5: **return**  $y_K$ .

---

We summarize results on performance of Algorithm 5 in the following corollary to Theorem 9:

**Theorem 24** Assume  $f$  is convex and has Hölder continuous  $(p-1)$ -st order gradients. Then Algorithm 5 satisfies the convergence rate upper bound

$$f(y_k) - f(x^*) = O\left(1/(\delta k)^{\frac{3(p-1+\nu)-2}{2}}\right).$$

To prove Theorem 24, the first thing to notice is that the proof of Theorem 9 holds for all  $\mathbb{R} \ni p > 0$ . Subsequently, to extend our analysis to Algorithm (5), it is sufficient to show (1) (78b) with the line search step (78a) satisfies

$$\|y_{k+1} - x_k - \lambda_{k+1} \nabla f(y_{k+1})\| \leq \frac{1}{2} \|y_{k+1} - x_k\| \quad (79)$$

and that (2) there exists a sequence  $(\lambda_{k+1}, y_{k+1})$  that satisfies (78b) and (78a) simultaneously.

(1) Observe that the optimality condition for (78b) satisfies

$$\nabla f_{p-1}(y_{k+1}; x_k) - \frac{1}{\eta} (y_{k+1} - x_k) \|y_{k+1} - x_k\|^{\tilde{p}-2} = 0.$$

so that  $\|\nabla f_{p-1}(y_{k+1}; x_k)\| = \frac{1}{\eta} \|y_{k+1} - x_k\|^{\tilde{p}-1}$ . In particular,

$$y_{k+1} - x_k + \lambda_{k+1} \nabla f(y_{k+1}) = \lambda_{k+1} \nabla f(y_{k+1}) - \frac{\eta}{\|y_{k+1} - x_k\|^{\tilde{p}-2}} \nabla f_{p-1}(y_{k+1}; x_k).$$

From the integral form of the mean value theorem it follows that

$$\|\nabla f_{p-1}(y; x) - \nabla f(y)\| \leq \frac{L_\nu}{(p-2)!} \|y - x\|^{p-2+\nu}.$$

Subsequently

$$\begin{aligned} \|y_{k+1} - x_k + \lambda_{k+1} \nabla f(y_{k+1})\| &\leq \lambda_{k+1} \frac{L_\nu}{(p-2)!} \|y_{k+1} - x_k\|^{\tilde{p}-1} + \left| \lambda_{k+1} - \frac{\eta}{\|y_{k+1} - x_k\|^{\tilde{p}-2}} \right| \|\nabla f_{p-1}(y_{k+1}; x_k)\| \\ &\leq \|y_{k+1} - x_k\| \left( \lambda_{k+1} \frac{L_\nu}{(p-2)!} \|y_{k+1} - x_k\|^{\tilde{p}-2} + \left| \frac{\lambda_{k+1}}{\eta} \|y_{k+1} - x_k\|^{\tilde{p}-2} + 1 \right| \right) \end{aligned}$$

If we choose  $\eta = L_\nu/(p-2)!$  and plug in our line search criterion (78a), we see condition (79) is met.

(2) We now show there exists a pair  $(\lambda_{k+1}, y_{k+1})$  that satisfies (78b) and (78a) simultaneously. This claim follows directly from the argument given by Bubeck et al (Bubeck et al., Sec 3.2), which did not rely on  $p > 0$  being an integer. For self-containment, we reproduce the argument here.

**Lemma 25** *Let  $A \geq 0$ ,  $x, y \in \mathbb{R}^d$  such that  $f(x) \neq f(x^*)$ . Define the following functions:*

$$\begin{aligned} a(\lambda) &= \frac{\lambda + \sqrt{\lambda^2 + 4\lambda A}}{2} \\ x(\lambda) &= \frac{a(\lambda)}{A + a(\lambda)}x + \frac{A}{A + a(\lambda)}y \\ y(z) &= \arg \min_{x \in \mathcal{X}} \left\{ f_{p-1}(w; z) + \frac{1}{\bar{p}\eta} \|w - z\|^{\bar{p}} \right\} \\ g(\lambda) &= \lambda \|y(x(\lambda)) - x(\lambda)\|^{\bar{p}-1}. \end{aligned}$$

*Then we have  $g(\mathbb{R}_+) = \mathbb{R}_+$ .*

The first claim is that  $g(\lambda)$  is a continuous function of  $\lambda$ . This follows from the fact that  $y(z)$  is a continuous function of  $z$ . Furthermore,  $g(0) = 0$ , and since  $f(x) \neq f(x^*)$  we also have  $y(x) \neq x$  which proves  $g(+\infty) = +\infty$ .

**Remark 3** *The same binary line search step introduced by Bubeck et al., Sec 4 finds a  $\lambda_{k+1}$  satisfying (78a). The argument given there did not rely on the fact that  $p \in \mathbb{Z}_+$ .*
